# Supplementary material for: Phosphorus complexes of a triply-fused [24]pentaphyrin
Source: Royal Society of Chemistry journal article supplement (doi:10.1039/c1sc00653c), 2011-09-27
Supplement: c1sc00653c.pdf [file c1sc00653c.pdf]

## Supporting Information

# Phosphorous complexes of a triply-fused [24]pentaphyrin

Tomohiro Higashino, and Atsuhiko Osuka\*

*Department of Chemistry, Graduate School of Science, Kyoto University,  
Sakyo-ku, Kyoto 606-8502, Japan*

E-mail: osuka@kuchem.kyoto-u.ac.jp

### Contents

1. Experimental Section
2. Synthesis
3. High-Resolution ESI-MS
4. UV / Vis Absorption Spectra
5. NMR Spectra
6. Cyclic Voltammograms
7. X-Ray Crystallographic Details
8. DFT Calculations
9. References

## 1. Experimental Section

### Instrumentation and Materials.

Commercially available solvents and reagents were used without further purification unless otherwise mentioned. Dry  $\text{CH}_2\text{Cl}_2$  was obtained by refluxing and distillation over  $\text{CaH}_2$ . Dry toluene was obtained by refluxing and distillation over  $\text{CaH}_2$ . Silica-gel column chromatography was performed on Wakogel C-300 or C-400. Alumina column chromatography was performed on Sumitomo Active alumina. UV/Vis absorption spectra were recorded with a Shimadzu UV-3100PC spectrometer.  $^1\text{H}$ ,  $^{19}\text{F}$ ,  $^{31}\text{P}$  and  $^{11}\text{B}$  NMR spectra were recorded with a JEOL ECA-600 spectrometer (operating at 600.17 MHz for  $^1\text{H}$ , 150.91 MHz for  $^{13}\text{C}$ , 564.73 MHz for  $^{19}\text{F}$ , 242.95 MHz for  $^{31}\text{P}$ , and 192.56 MHz for  $^{11}\text{B}$ ) by using the residual solvent as the internal reference for  $^1\text{H}$  ( $\text{CDCl}_3$ :  $\delta = 7.26$  ppm), the residual solvent as the internal reference for  $^{13}\text{C}$  ( $\text{CDCl}_3$ :  $\delta = 77.16$  ppm,  $\text{CD}_2\text{Cl}_2$ :  $\delta = 53.84$  ppm), hexafluorobenzene as the external reference for  $^{19}\text{F}$  ( $\delta = -162.9$  ppm), 85% phosphoric acid as the external reference for  $^{31}\text{P}$  ( $\delta = 0.00$  ppm), and  $\text{BF}_3 \cdot \text{Et}_2\text{O}$  as the external reference for  $^{11}\text{B}$  ( $\delta = 0.00$  ppm). NMR signals were assigned from the  $^1\text{H}$ - $^1\text{H}$  COSY,  $^{19}\text{F}$ - $^{19}\text{F}$  COSY,  $^1\text{H}$ - $^{31}\text{P}$  HMBC spectra, and the comparison with the spectra in the presence of  $\text{D}_2\text{O}$  (signals assigned for NH protons disappear in the presence of  $\text{D}_2\text{O}$ ). Mass spectra were recorded with a BRUKER microTOF LC by using the ESI-TOF method in the positive ion mode and in the negative ion mode in an acetonitrile solution. Single-crystal X-ray diffraction analysis data for compound **2**, **3**, and **4** were collected at  $-180$  °C with a Rigaku R-Axis RAPID II diffraction by using graphite monochromated Cu-K $\alpha$  radiation ( $\lambda = 1.54187$  Å). The structures were solved by direct method (SHELXS-97). Redox potentials were measured by cyclic voltammetry method on an ALS electrochemical analyzer model 660.

## 2. Synthesis

### *meso*-Pentakis(pentafluorophenyl)-substituted *N*-fused [24]pentaphyrin(1.1.1.1.1) (**1**):

For **1**, the synthetic details were previously described.<sup>[S1]</sup>

### Phosphine oxide complex of *meso*-pentakis(pentafluorophenyl)-substituted *N*-fused [24]pentaphyrin(1.1.1.1.1) (**2**):

A dry flask containing **1** (31.0 mg, 25  $\mu\text{mol}$ ) was filled with  $\text{N}_2$ , to which were added toluene (25 mL),  $\text{POCl}_3$  (0.23 mL, 2.5 mmol) and triethylamine (0.70 mL, 5.0 mmol). The reaction mixture was stirred for 12 h under  $\text{N}_2$  atmosphere at 120 °C. Then, the reaction was quenched by the addition of

water, and the product was extracted with ethyl acetate (3 × 25 mL). The combined organic layer was washed with water and dried over Na<sub>2</sub>SO<sub>4</sub> and the solvent was removed. The crude product was purified by silica gel column chromatography using CH<sub>2</sub>Cl<sub>2</sub> to give an orange fraction. Recrystallization from CH<sub>2</sub>Cl<sub>2</sub> and *n*-hexane gave brown solid of **2** (20.7 mg, 16.7 μmol, 66%). Single crystals suitable for X-ray crystallographic analysis were obtained by vapor diffusion of hexane into chlorobenzene solution of **2**.

**2**: <sup>1</sup>H NMR (600.17 MHz, CDCl<sub>3</sub>, 25 °C): δ = 6.35 (d, *J* = 4.8 Hz, 1H, β<sub>D</sub>), 6.05 (d, *J* = 4.8 Hz, 1H, β<sub>D</sub>), 4.59 (t, *J* = 3.4 Hz, 1H, β<sub>A</sub>), 4.43 (quintet, *J* = 4.8 Hz, 1H, β<sub>A</sub>), and 4.34 (d, *J* = 2.0 Hz, 2H, β<sub>B</sub>) ppm; <sup>13</sup>C NMR (150.91 MHz, CD<sub>2</sub>Cl<sub>2</sub>, 25 °C): δ = 150.5, 145.6, 145.0, 144.9, 144.7, 144.5, 144.4, 144.2, 143.2, 143.0, 142.8, 142.3, 142.0, 141.9, 141.5, 141.1, 141.0, 140.2, 140.1, 139.7, 139.5, 139.1, 138.3, 138.2, 138.1, 137.9, 137.8, 137.5, 137.3, 134.2, 139.8, 129.5, 129.3, 129.2, 127.0, 126.9, 125.1, 124.4, 123.3, 123.1, 123.0, 122.8, 122.0, 121.9, 119.5, 116.7, 113.1, 110.4, 106.4, 106.0, 104.8, 102.9, 100.3, 99.6, and 96.2 ppm; <sup>19</sup>F NMR (564.73 MHz, CDCl<sub>3</sub>, 25 °C): δ = -133.46 (d, *J* = 24.2 Hz, 1F, *ortho*-F), -134.25 (m, 1F), -135.60 (d, *J* = 24.2 Hz, 1F, *ortho*-F), -136.43 (d, *J* = 24.2 Hz, 1F, *ortho*-F), -136.55 (d, *J* = 24.2 Hz, 1F, *ortho*-F), -137.22 (d, *J* = 20.7 Hz, 1F, *ortho*-F), -137.30 (d, *J* = 20.7 Hz, 1F, *ortho*-F), -137.46 (d, *J* = 17.3 Hz, 1F, *ortho*-F), -137.88 (d, *J* = 24.2 Hz, 1F, *ortho*-F), -150.08 (t, *J* = 20.7 Hz, 1F, *para*-F), -151.17 (t, *J* = 20.7 Hz, 1F, *para*-F), -152.12 (t, *J* = 20.7 Hz, 1F, *para*-F), -153.82 (t, *J* = 20.7 Hz, 1F, *para*-F), -154.51 (t, *J* = 20.7 Hz, 1F), -158.97 (td, *J* = 24.2 Hz, *J* = 10.4 Hz, 1F, *meta*-F), -159.68 (td, *J* = 20.7 Hz, *J* = 6.9 Hz, 1F, *meta*-F), -159.98 (td, *J* = 20.7 Hz, *J* = 6.9 Hz, 1F, *meta*-F), -160.48 (td, *J* = 20.7 Hz, *J* = 10.4 Hz, 1F, *meta*-F), -160.65 (t, *J* = 17.3 Hz, 1F), -161.90 (td, *J* = 20.7 Hz, *J* = 6.9 Hz, 1F, *meta*-F), -162.14 (m, 2F, *meta*-F), -162.92 (t, *J* = 20.7 Hz, 1F, *meta*-F), and -163.82 (t, *J* = 20.7 Hz, 1F) ppm; <sup>31</sup>P NMR (242.95 MHz, CDCl<sub>3</sub>, 25 °C): δ = 7.12 (s) ppm. UV/vis: λ<sub>max</sub>(CH<sub>2</sub>Cl<sub>2</sub>)/nm 319 (ε/dm<sup>3</sup> mol<sup>-1</sup> cm<sup>-1</sup> 45000), 398 (47000), 473 (25000), 561 (10000), 696 (2000) and 770 (1600). HRMS (ESI-TOF, negative) calcd. for C<sub>55</sub>H<sub>6</sub>F<sub>24</sub>N<sub>5</sub>OPCl [M+Cl]<sup>-</sup> 1273.9621; found 1273.9612.

**Phosphine sulfide complex of meso-pentakis(pentafluorophenyl)-substituted N-fused [24]pentaphyrin(1.1.1.1.1) (3):**

A dry flask containing **2** (11.5 mg, 9.3 μmol) and Lawesson's Reagent (7.8 mg, 19 μmol) was filled with N<sub>2</sub>, to which were added toluene (25 mL). The reaction mixture was refluxed for 1 h under N<sub>2</sub> atmosphere, and then cooled down. After evaporation of the solvent, the residue was separated by silica gel column chromatography using a 1:1 mixture of CH<sub>2</sub>Cl<sub>2</sub> and *n*-hexane to give an orange fraction. Recrystallization from CH<sub>2</sub>Cl<sub>2</sub> and *n*-hexane gave brown solid of **3** (9.7 mg, 7.8 μmol, 84%). Single crystals suitable for X-ray crystallographic analysis were obtained by vapor diffusion of

heptane into toluene solution of **3**.

**3**:  $^1\text{H}$  NMR (600.17 MHz,  $\text{CDCl}_3$ , 25 °C):  $\delta$  = 6.18 (d,  $J$  = 4.8 Hz, 1H,  $\beta_{\text{D}}$ ), 5.88 (d,  $J$  = 4.8 Hz, 1H,  $\beta_{\text{D}}$ ), 4.36 (s, 1H,  $\beta_{\text{A}}$ ), 4.26 (quintet,  $J$  = 4.8 Hz, 1H,  $\beta_{\text{A}}$ ), 4.16 (d,  $J$  = 5.5 Hz, 1H,  $\beta_{\text{B}}$ ), and 4.13 (d,  $J$  = 5.5 Hz, 1H,  $\beta_{\text{B}}$ ) ppm;  $^{13}\text{C}$  NMR (150.91 MHz,  $\text{CDCl}_3$ , 25 °C):  $\delta$  = 165.0, 164.9, 155.3, 153.3, 153.1, 150.2, 145.2, 144.6, 144.4, 144.3, 144.2, 144.1, 143.8, 142.5, 142.0, 141.6, 141.4, 140.8, 140.1, 139.6, 139.5, 137.8, 137.7, 137.4, 137.3, 137.2, 137.0, 136.8, 133.8, 133.6, 131.5, 131.4, 129.6, 129.3, 129.2, 127.6, 127.5, 126.3, 125.3, 125.2, 124.3, 123.5, 122.9, 122.7, 122.3, 121.7, 121.6, 115.9, 109.8, 105.9, 105.6, 104.3, 103.3, 99.9, and 99.7 ppm;  $^{19}\text{F}$  NMR (564.73 MHz,  $\text{CDCl}_3$ , 25 °C):  $\delta$  = -133.27 (d,  $J$  = 24.2 Hz, 1F, *ortho*-F), -134.11 (m, 1F), -135.70 (d,  $J$  = 24.2 Hz, 1F, *ortho*-F), -136.24 (t,  $J$  = 24.2 Hz, 2F, *ortho*-F), -137.35 (d,  $J$  = 24.2 Hz, 1F, *ortho*-F), -137.46 (d,  $J$  = 20.7 Hz, 1F, *ortho*-F), -137.72 (d,  $J$  = 20.7 Hz, 2F, *ortho*-F), -150.34 (t,  $J$  = 20.7 Hz, 1F, *para*-F), -151.45 (t,  $J$  = 20.7 Hz, 1F, *para*-F), -152.32 (t,  $J$  = 20.7 Hz, 1F, *para*-F), -154.11 (t,  $J$  = 20.7 Hz, 1F, *para*-F), -155.04 (t,  $J$  = 20.7 Hz, 1F), -159.20 (td,  $J$  = 24.2 Hz,  $J$  = 10.3 Hz, 1F, *meta*-F), -159.78 (td,  $J$  = 20.7 Hz,  $J$  = 10.3 Hz, 1F, *meta*-F), -160.08 (td,  $J$  = 20.7 Hz,  $J$  = 6.9 Hz, 1F, *meta*-F), -160.60 (td,  $J$  = 24.2 Hz,  $J$  = 10.3 Hz, 1F, *meta*-F), -160.71 (t,  $J$  = 17.3 Hz, 1F), -162.05 (td,  $J$  = 24.7 Hz,  $J$  = 6.9 Hz, 1F, *meta*-F), -162.25 (m, 2F, *meta*-F), -163.08 (t,  $J$  = 20.7 Hz, 1F, *meta*-F), and -164.06 (t,  $J$  = 20.7 Hz, 1F) ppm;  $^{31}\text{P}$  NMR (242.95 MHz,  $\text{CDCl}_3$ , 25 °C):  $\delta$  = 58.55 (s) ppm. UV/vis:  $\lambda_{\text{max}}(\text{CH}_2\text{Cl}_2)/\text{nm}$  318 ( $\epsilon/\text{dm}^3 \text{mol}^{-1} \text{cm}^{-1}$  51000), 403 (55000), 477 (33000), 581 (13000), 707 (2700) and 784 (2500) nm. HRMS (ESI-TOF, negative) calcd. for  $\text{C}_{55}\text{H}_6\text{F}_{24}\text{N}_5\text{SPCl}$  [ $M+\text{Cl}$ ] $^-$  1289.9392; found 1289.9379.

**Phosphine-borane complex of meso-pentakis(pentafluorophenyl)-substituted N-fused [24]pentaphyrin(1.1.1.1.1) (4):**

A dry flask containing **2** (12.3 mg, 10  $\mu\text{mol}$ ) was filled with  $\text{N}_2$ , to which were added  $\text{CH}_2\text{Cl}_2$  (10 mL) and  $\text{BH}_3\cdot\text{SMe}_2$  (19  $\mu\text{L}$ ). The reaction mixture was stirred for 24 h under  $\text{N}_2$  atmosphere. After evaporation of the solvent, the residue was separated by silica gel column chromatography using a 1:1 mixture of  $\text{CH}_2\text{Cl}_2$  and *n*-hexane to give an orange fraction. Recrystallization from  $\text{CH}_2\text{Cl}_2$  and *n*-hexane gave brown solid of **4** (6.7 mg, 5.4  $\mu\text{mol}$ , 54%). Single crystals suitable for X-ray crystallographic analysis were obtained by vapor diffusion of hexane into toluene solution of **4**.

**4**:  $^1\text{H}$  NMR (600.17 MHz,  $\text{CDCl}_3$ , 25 °C):  $\delta$  = 7.22 (d,  $J$  = 4.2 Hz, 1H,  $\beta_{\text{D}}$ ), 6.96 (d,  $J$  = 4.2 Hz, 1H,  $\beta_{\text{D}}$ ), 6.33 (quintet,  $J$  = 4.8 Hz, 1H,  $\beta_{\text{A}}$ ), 5.57 (d,  $J$  = 3.5 Hz, 1H,  $\beta_{\text{A}}$ ), 2.65 (m, 1H,  $\beta_{\text{B}}$ ), 2.53 (m, 1H,  $\beta_{\text{B}}$ ), 2.37 (m, 1H,  $\beta_{\text{B}}$ ), 2.28 (br, 3H,  $\text{BH}_3$ ), and 2.18 (m, 1H,  $\beta_{\text{B}}$ ) ppm;  $^{13}\text{C}$  NMR (150.91 MHz,  $\text{CDCl}_3$ , 25 °C):  $\delta$  = 159.2, 159.1, 153.3, 153.2, 151.2, 145.7, 145.2, 145.0, 144.9, 144.5, 142.6, 142.2, 141.9, 141.7, 141.4, 141.2, 141.1, 139.9, 138.2, 138.1, 138.0, 137.9, 137.7, 137.6, 137.4, 136.9, 134.7, 134.4, 134.2, 134.1, 134.0, 131.9,

127.5, 127.4, 127.1, 127.0, 123.6, 122.0, 121.9, 121.2, 119.2, 117.2, 117.0, 112.7, 111.4, 108.8, 108.5, 106.1, 105.7, 105.6, 101.0, 99.2, 96.8, 27.0, and 24.5 ppm;  $^{19}\text{F}$  NMR (564.73 MHz,  $\text{CDCl}_3$ , 25 °C):  $\delta = -133.44$  (d,  $J = 24.2$  Hz, 1F, *ortho*-F),  $-133.90$  (m, 1F),  $-135.88$  (d,  $J = 24.2$  Hz, 1F, *ortho*-F),  $-136.89$  (d,  $J = 24.2$  Hz, 1F, *ortho*-F),  $-137.17$  (d,  $J = 20.7$  Hz, 1F, *ortho*-F),  $-137.44$  (d,  $J = 24.2$  Hz, 1F, *ortho*-F),  $-137.78$  (t,  $J = 24.2$  Hz, 2F, *ortho*-F),  $-137.86$  (d,  $J = 20.7$  Hz, 1F, *ortho*-F),  $-150.41$  (t,  $J = 20.7$  Hz, 1F, *para*-F),  $-151.94$  (t,  $J = 20.7$  Hz, 1F, *para*-F),  $-152.32$  (t,  $J = 20.7$  Hz, 1F, *para*-F),  $-153.94$  (t,  $J = 20.7$  Hz, 1F, *para*-F),  $-154.38$  (t,  $J = 20.7$  Hz, 1F),  $-159.54$  (td,  $J = 24.2$  Hz,  $J = 6.9$  Hz, 1F, *meta*-F),  $-160.02$  (m, 2F),  $-160.32$  (td,  $J = 20.7$  Hz,  $J = 6.9$  Hz, 1F, *meta*-F),  $-160.55$  (td,  $J = 24.2$  Hz,  $J = 6.9$  Hz, 1F, *meta*-F),  $-161.85$  (td,  $J = 20.7$  Hz,  $J = 6.9$  Hz, 1F, *meta*-F),  $-162.07$  (td,  $J = 24.2$  Hz,  $J = 6.9$  Hz, 1F, *meta*-F),  $-162.36$  (t,  $J = 20.7$  Hz, 1F, *meta*-F),  $-163.29$  (t,  $J = 20.7$  Hz, 1F, *meta*-F), and  $-163.68$  (t,  $J = 20.7$  Hz, 1F) ppm;  $^{31}\text{P}$  NMR (242.95 MHz,  $\text{CDCl}_3$ , 25 °C):  $\delta = 119.22$  (br) ppm;  $^{11}\text{B}$  NMR (192.56 MHz,  $\text{CDCl}_3$ , 25 °C):  $\delta = -32 \sim -33$  (br) ppm. UV/vis:  $\lambda_{\text{max}}(\text{CH}_2\text{Cl}_2)/\text{nm}$  355 (sh) ( $\epsilon/\text{dm}^3 \text{mol}^{-1} \text{cm}^{-1}$  44000), 393 (54000), 479 (20000), 571 (8200), 645 (3000) and 865 (2800) nm. HRMS (ESI-TOF, negative) calcd. for  $\text{C}_{55}\text{H}_{10}\text{F}_{24}\text{N}_5\text{PB}$   $[\text{M}-\text{H}]^-$  1238.0398; found 1238.0370.

**Phosphine oxide complex of chlorin-type meso-pentakis(pentafluorophenyl)-substituted N-fused [24]pentaphyrin(1.1.1.1) (5):**

A dry Schlenk flask containing **4** (12.4 mg, 10  $\mu\text{mol}$ ) was filled with  $\text{N}_2$ , to which were added freshly distilled  $\text{CH}_2\text{Cl}_2$  (2 mL) and freshly distilled triethylamine (28  $\mu\text{L}$ , 200  $\mu\text{mol}$ ). The reaction mixture was stirred for 12 h under  $\text{N}_2$  atmosphere. The reaction mixture was passed through a short silica gel column followed by evaporation of the solvent. The residue was separated by silica gel column chromatography using  $\text{CH}_2\text{Cl}_2$  to give an orange fraction. Recrystallization from  $\text{CH}_2\text{Cl}_2$  and *n*-hexane gave brown solid of **5** (3.8 mg, 3.1  $\mu\text{mol}$ , 31%). Single crystals suitable for X-ray crystallographic analysis were obtained by vapor diffusion of water into acetonitrile/tetrachloromethane solution of **5**.

**5:**  $^1\text{H}$  NMR (600.17 MHz,  $\text{CDCl}_3$ , 25 °C):  $\delta = 7.39$  (d,  $J = 4.8$  Hz, 1H,  $\beta_{\text{D}}$ ), 7.12 (d,  $J = 4.8$  Hz, 1H,  $\beta_{\text{D}}$ ), 6.42 (quintet,  $J = 4.8$  Hz, 1H,  $\beta_{\text{A}}$ ), 5.74 (s, 1H,  $\beta_{\text{A}}$ ), 2.88 (m, 1H,  $\beta_{\text{B}}$ ), 2.73 (m, 1H,  $\beta_{\text{B}}$ ), 2.56 (m, 1H,  $\beta_{\text{B}}$ ), and 2.38 (m, 1H,  $\beta_{\text{B}}$ ) ppm;  $^{13}\text{C}$  NMR (150.91 MHz,  $\text{CDCl}_3$ , 25 °C):  $\delta = 159.2$ , 159.1, 153.3, 153.2, 151.2, 145.7, 145.3, 145.0, 144.9, 144.5, 142.6, 142.2, 141.9, 141.7, 141.4, 141.2, 141.1, 139.9, 138.2, 138.1, 138.0, 137.9, 137.7, 137.6, 137.5, 137.4, 136.9, 134.7, 134.4, 134.2, 134.1, 134.0, 131.9, 127.5, 127.4, 127.0, 123.6, 122.0, 121.9, 121.2, 119.2, 117.2, 117.0, 112.7, 111.4, 108.8, 108.5, 106.1, 105.7, 105.6, 101.0, 99.2, 96.8, 26.9, and 24.5 ppm;  $^{19}\text{F}$  NMR (564.73 MHz,  $\text{CDCl}_3$ , 25 °C):  $\delta = -133.50$  (d,  $J = 24.2$  Hz, 1F, *ortho*-F),  $-134.30$  (m, 1F),  $-136.00$  (d,  $J = 17.3$  Hz, 1F, *ortho*-F),  $-136.89$  (t,  $J = 24.2$  Hz, 2F, *ortho*-F),  $-137.28$  (d,  $J = 24.2$  Hz, 2F, *ortho*-F),  $-137.78$  (t,  $J = 24.2$  Hz, 2F, *ortho*-F),  $-150.41$  (t,  $J = 20.7$  Hz, 1F, *para*-F),  $-151.94$  (t,  $J = 20.7$  Hz, 1F, *para*-F),  $-152.32$  (t,  $J = 20.7$  Hz, 1F, *para*-F),  $-153.94$  (t,  $J = 20.7$  Hz, 1F, *para*-F),  $-154.38$  (t,  $J = 20.7$  Hz, 1F),  $-159.54$  (td,  $J = 24.2$  Hz,  $J = 6.9$  Hz, 1F, *meta*-F),  $-160.02$  (m, 2F),  $-160.32$  (td,  $J = 20.7$  Hz,  $J = 6.9$  Hz, 1F, *meta*-F),  $-160.55$  (td,  $J = 24.2$  Hz,  $J = 6.9$  Hz, 1F, *meta*-F),  $-161.85$  (td,  $J = 20.7$  Hz,  $J = 6.9$  Hz, 1F, *meta*-F),  $-162.07$  (td,  $J = 24.2$  Hz,  $J = 6.9$  Hz, 1F, *meta*-F),  $-162.36$  (t,  $J = 20.7$  Hz, 1F, *meta*-F),  $-163.29$  (t,  $J = 20.7$  Hz, 1F, *meta*-F), and  $-163.68$  (t,  $J = 20.7$  Hz, 1F) ppm.

= 20.7 Hz, 1F, *ortho*-F), -137.32 (d,  $J = 24.2$  Hz, 1F, *ortho*-F), -137.72 (d,  $J = 20.7$  Hz, 1F, *ortho*-F), -137.99 (d,  $J = 24.2$  Hz, 1F, *ortho*-F), -150.25 (t,  $J = 20.7$  Hz, 1F, *para*-F), -151.65 (t,  $J = 20.7$  Hz, 1F, *para*-F), -152.11 (t,  $J = 20.7$  Hz, 1F, *para*-F), -153.62 (t,  $J = 20.7$  Hz, 1F, *para*-F), -153.98 (t,  $J = 20.7$  Hz, 1F), -159.36 (td,  $J = 20.7$  Hz,  $J = 10.3$  Hz, 1F, *meta*-F), -160.01 (m, 2F), -160.18 (td,  $J = 24.2$  Hz,  $J = 6.9$  Hz, 1F, *meta*-F), -160.44 (td,  $J = 20.7$  Hz,  $J = 6.9$  Hz, 1F, *meta*-F), -160.70 (td,  $J = 24.2$  Hz,  $J = 10.3$  Hz, 1F), -161.93 (td,  $J = 24.2$  Hz,  $J = 6.9$  Hz, 1F, *meta*-F), -162.34 (t,  $J = 20.7$  Hz, 1F, *meta*-F), -163.16 (t,  $J = 24.2$  Hz, 1F, *meta*-F), and -163.61 (t,  $J = 20.7$  Hz, 1F) ppm;  $^{31}\text{P}$  NMR (242.95 MHz,  $\text{CDCl}_3$ , 25 °C):  $\delta = -2.68$  (s) ppm. UV/vis:  $\lambda_{\text{max}}(\text{CH}_2\text{Cl}_2)/\text{nm}$  326 ( $\epsilon/\text{dm}^3 \text{mol}^{-1} \text{cm}^{-1}$  49000), 393 (56000), 480 (16000), 560 (sh, 8800), and 780 (3300) nm. HRMS (ESI-TOF, positive) calcd. for  $\text{C}_{55}\text{H}_9\text{F}_{24}\text{N}_5\text{PO}$   $[M+\text{H}]^+$  1242.0156; found 1242.0142.

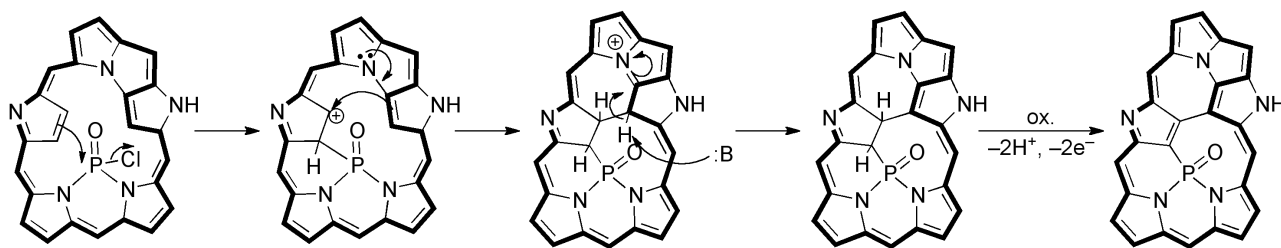

**Scheme S1.** The plausible mechanism of  $\beta$ - $\beta$  bond formation.

### 3. High-Resolution ESI-MS

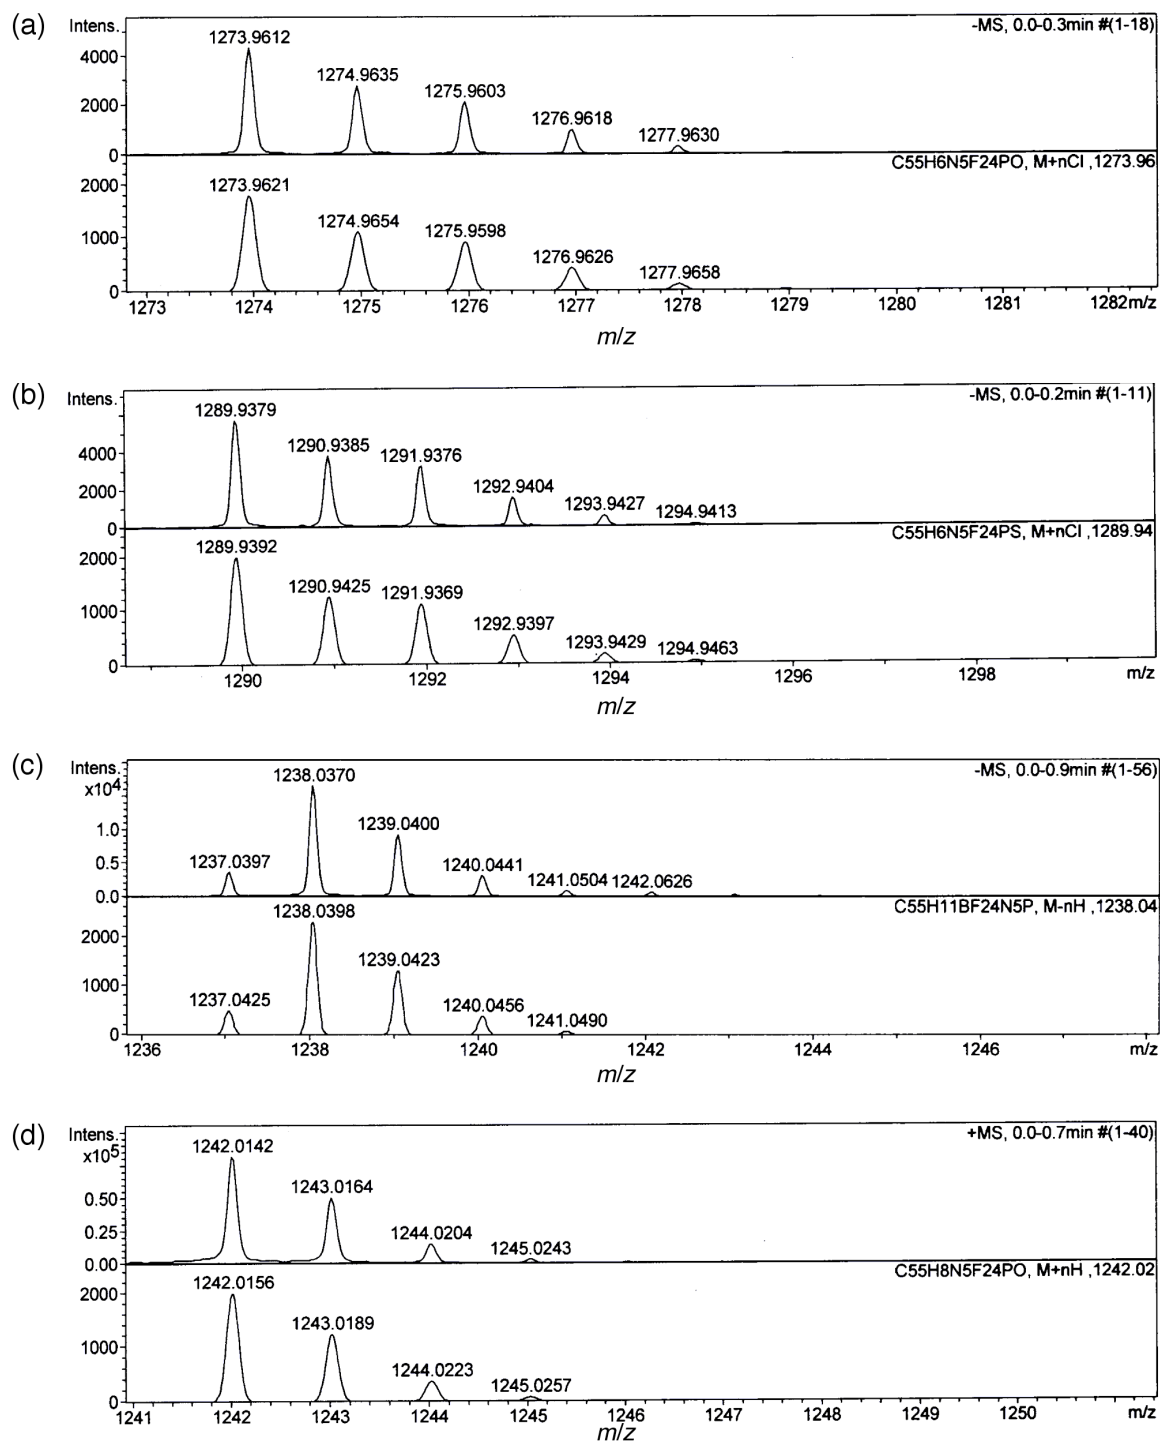

Figure S1. Observed (top) and simulated (bottom) high-resolution ESI-MS of (a) 2, (b) 3, (c) 4, and (d) 5.

#### 4. UV/Vis Absorption Spectra

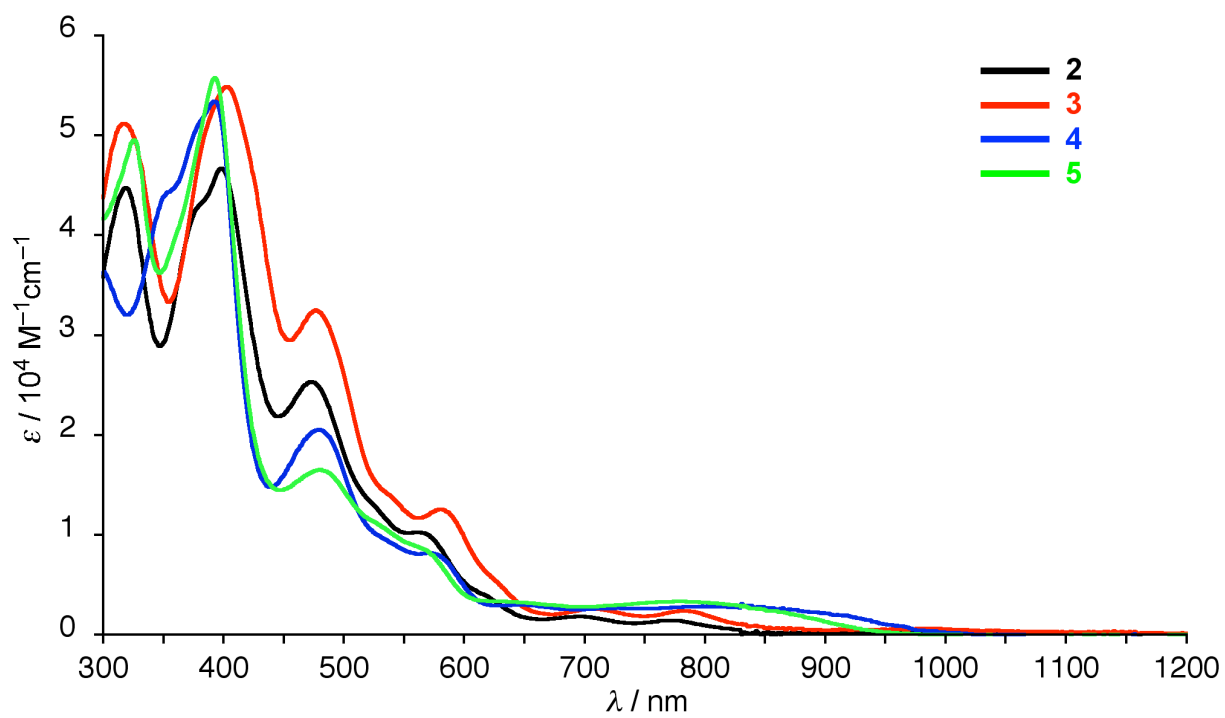

Figure S2. UV/Vis absorption spectra of 2 (black), 3 (red), 4 (blue) and 5 (green) in CH<sub>2</sub>Cl<sub>2</sub>.



## 5. NMR Spectra

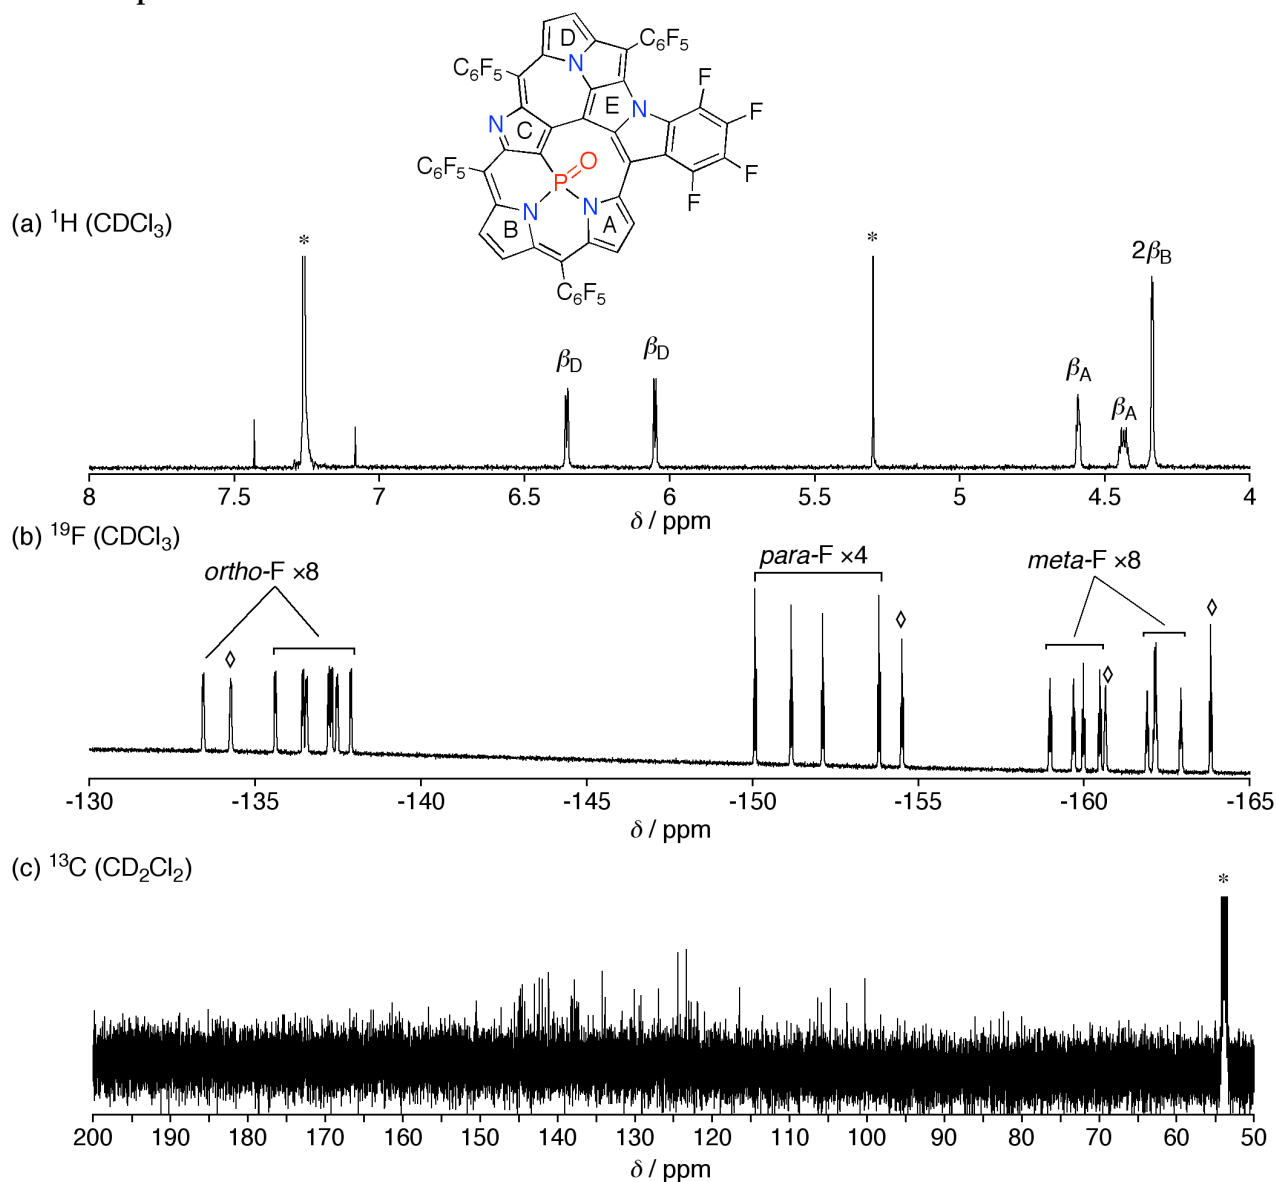

**Figure S3.** (a)  $^1\text{H}$ , (b)  $^{19}\text{F}$  and (c)  $^{13}\text{C}$  NMR spectra of **2** at 25 °C. Peaks marked with \* are due to residual solvents and impurities. Peaks marked with  $\diamond$  are signals of fluorine atoms at the *N*-fused aryl substituent.

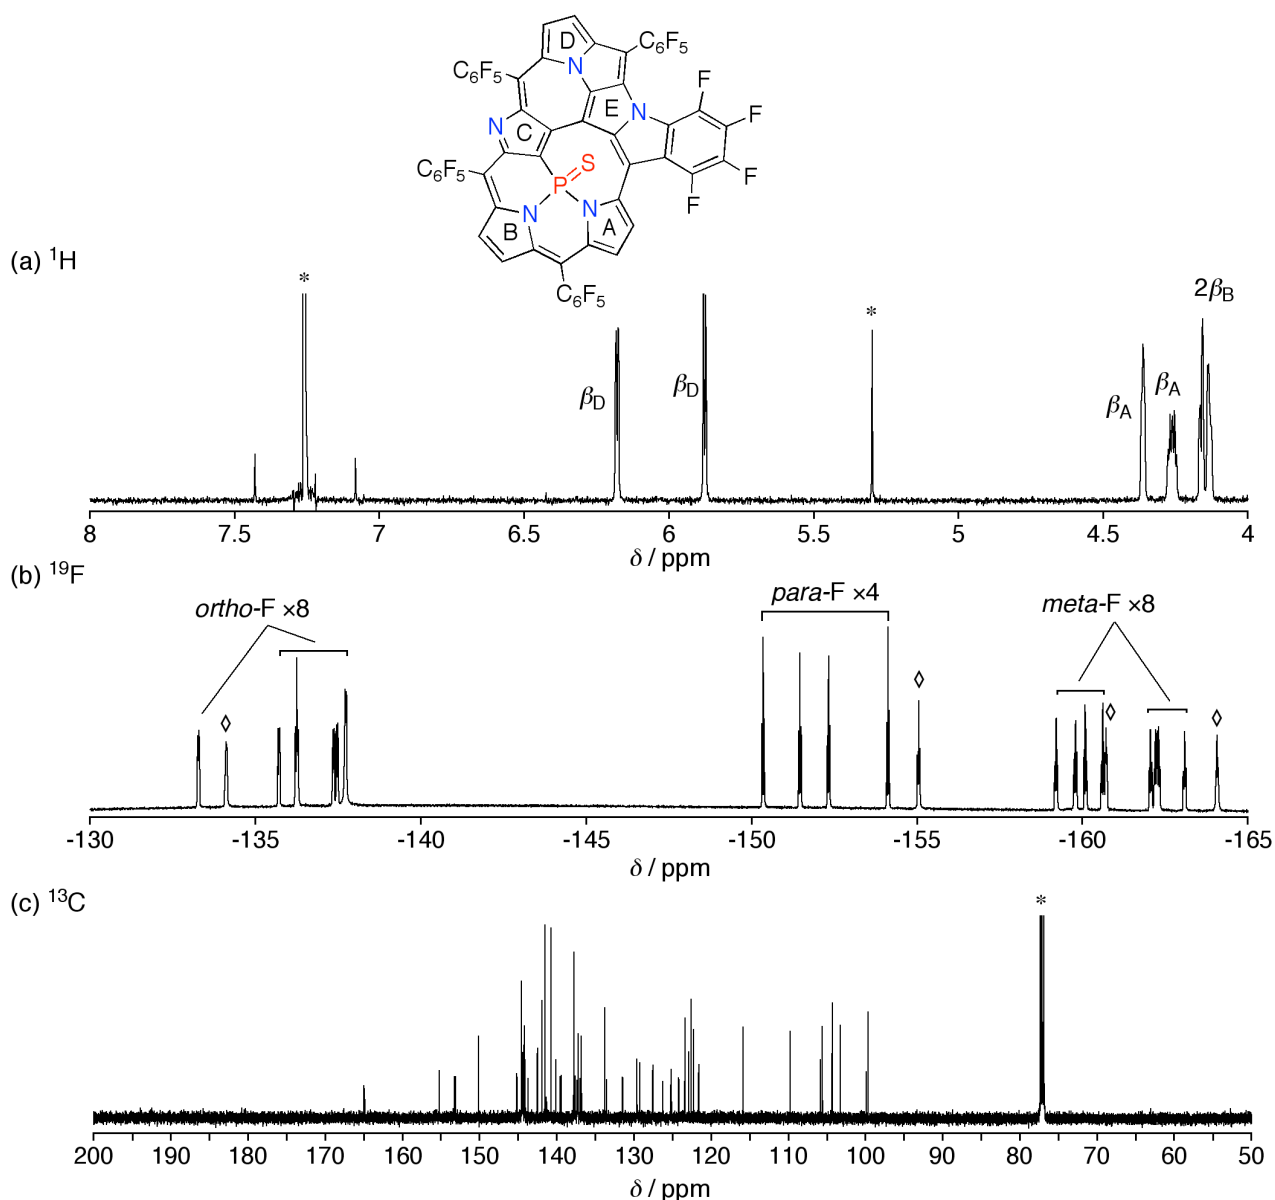

**Figure S4.** (a) <sup>1</sup>H, (b) <sup>19</sup>F and (c) <sup>13</sup>C NMR spectra of **3** in CDCl<sub>3</sub> at 25 °C. Peaks marked with \* are due to residual solvents and impurities. Peaks marked with ◊ are signals of fluorine atoms at the N-fused aryl substituent.

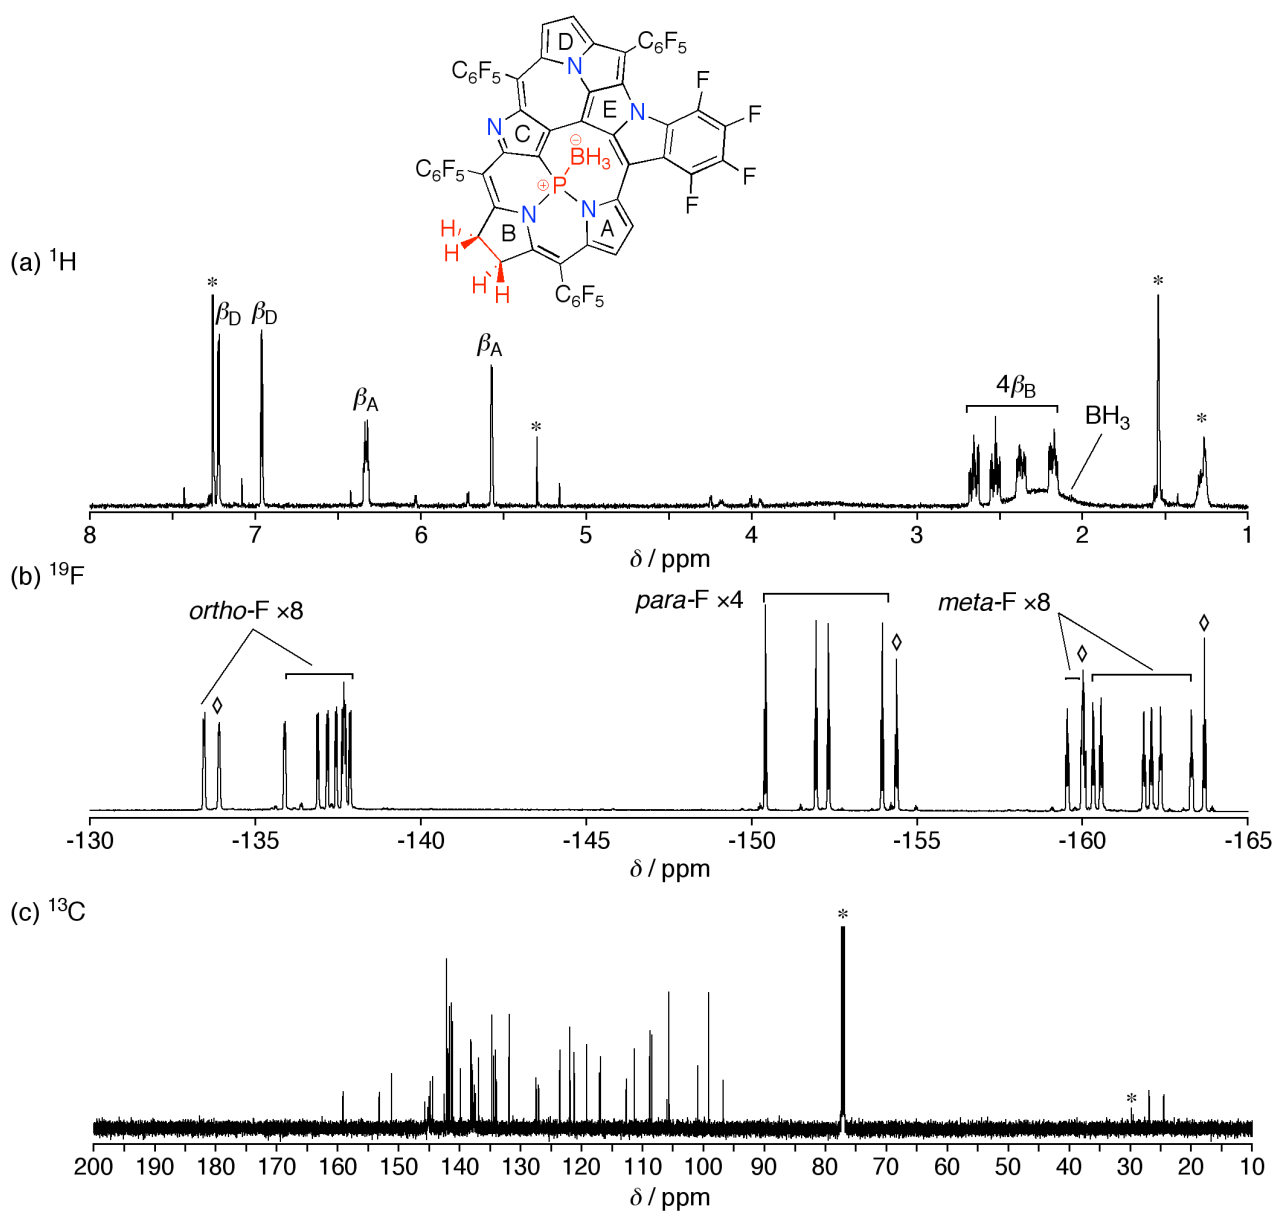

**Figure S5.** (a)  $^1\text{H}$ , (b)  $^{19}\text{F}$  and (c)  $^{13}\text{C}$  NMR spectra of 4 in  $\text{CDCl}_3$  at 25 °C. Peaks marked with \* are due to residual solvents and impurities. Peaks marked with  $\diamond$  are signals of fluorine atoms at the N-fused aryl substituent.

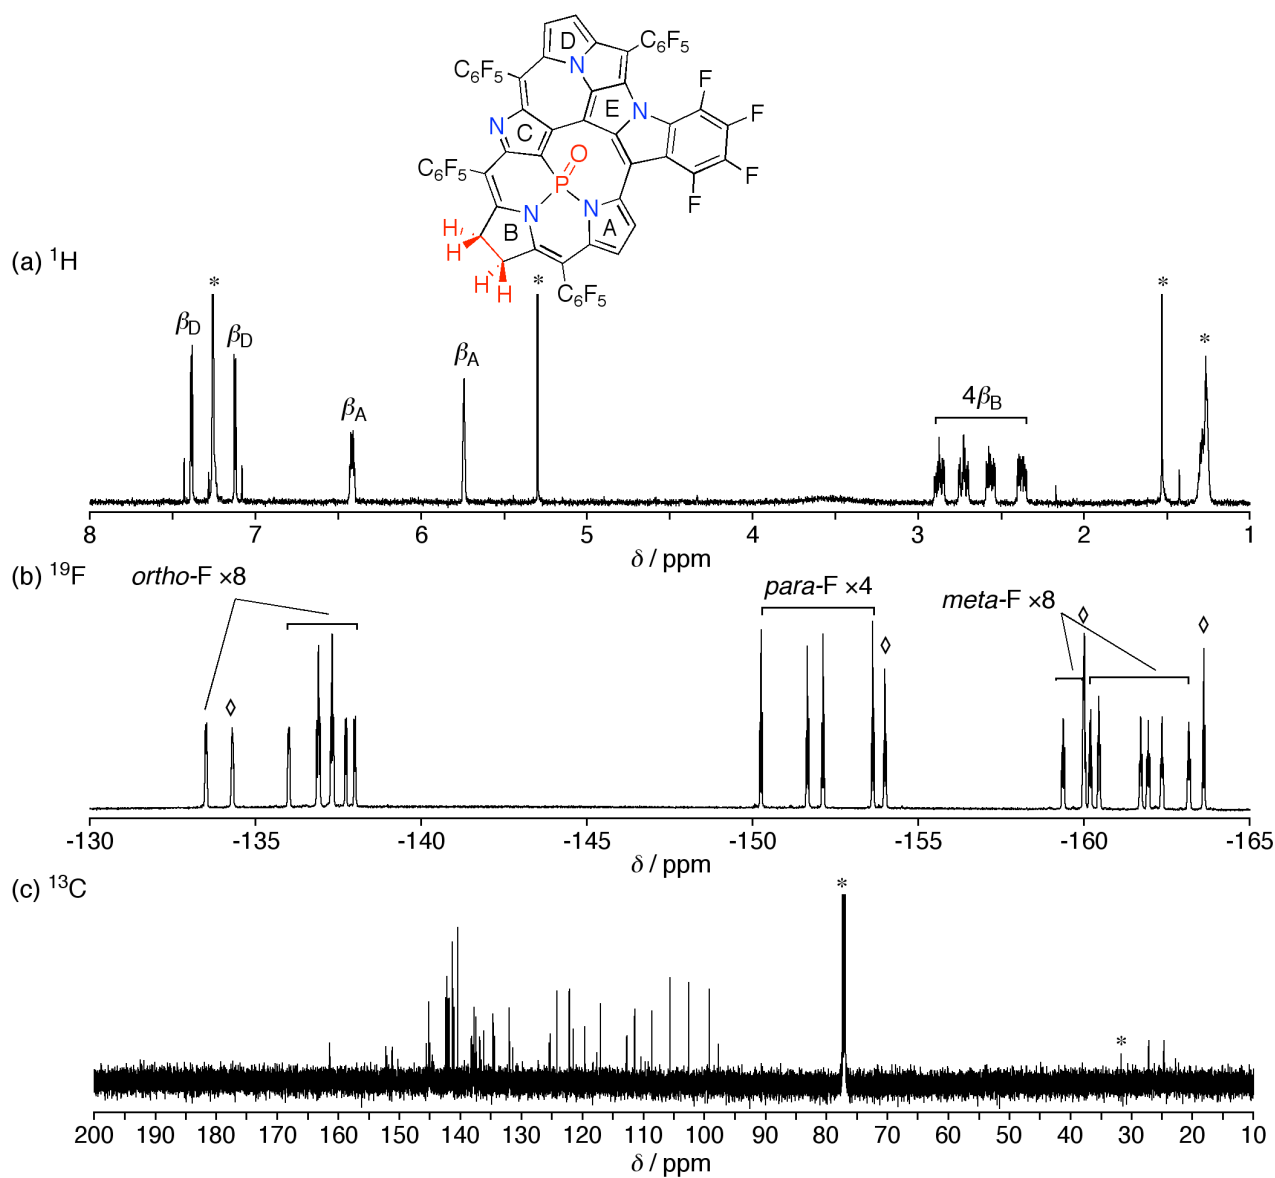

**Figure S6.** (a)  $^1\text{H}$ , (b)  $^{19}\text{F}$  and (c)  $^{13}\text{C}$  NMR spectra of 5 in  $\text{CDCl}_3$  at 25 °C. Peaks marked with \* are due to residual solvents and impurities. Peaks marked with  $\diamond$  are signals of fluorine atoms at the N-fused aryl substituent.

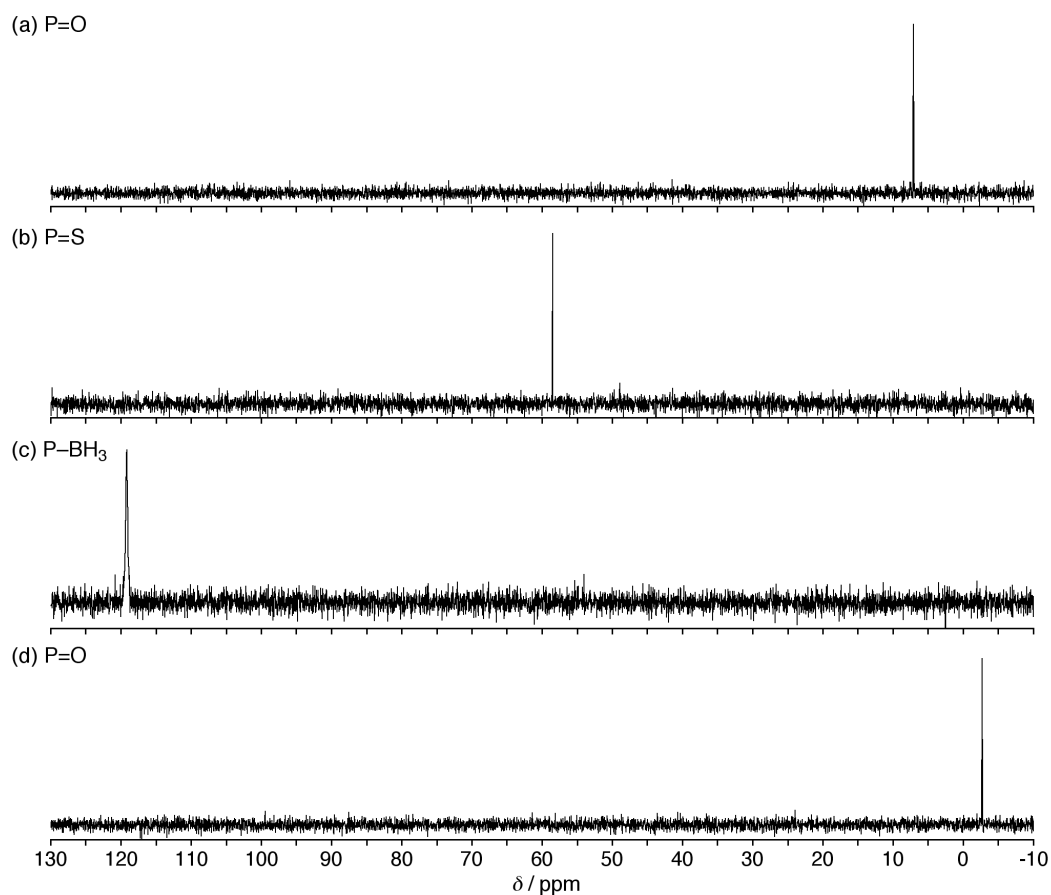

**Figure S7.**  $^{31}\text{P}$  NMR spectra of (a) **2**, (b) **3**, (c) **4**, and (d) **5** in  $\text{CDCl}_3$  at  $25^\circ\text{C}$ .

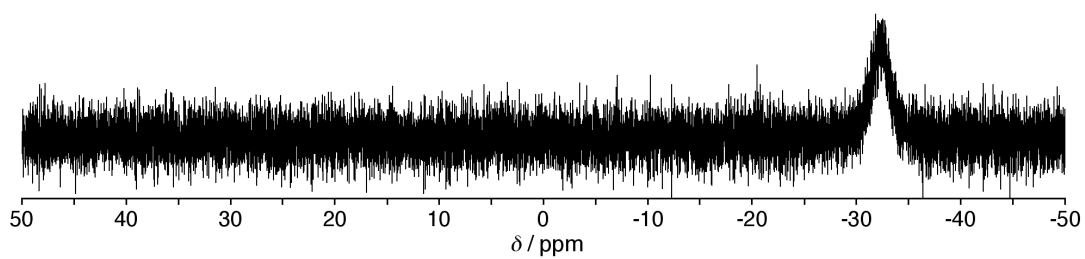

**Figure S8.**  $^{11}\text{B}$  NMR spectrum of **4** in  $\text{CDCl}_3$  at  $25^\circ\text{C}$ .

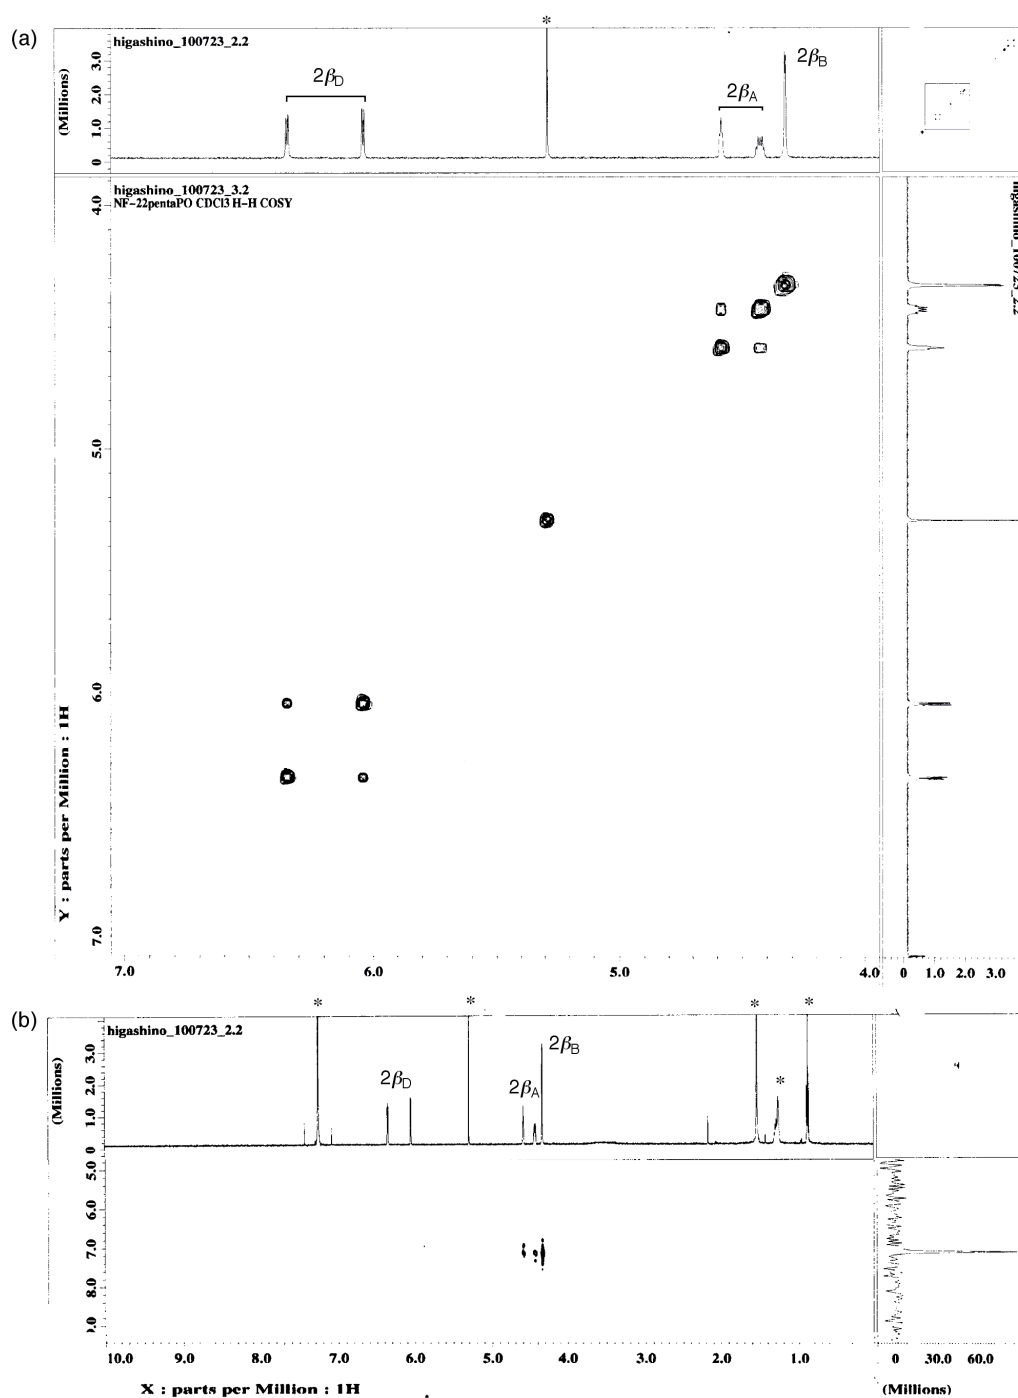

Figure S9. (a) <sup>1</sup>H-<sup>1</sup>H COSY and (b) <sup>1</sup>H-<sup>31</sup>P HMBC NMR spectra of 2 in CDCl<sub>3</sub> at 25 °C. Peaks marked with \* are due to residual solvents and impurities.

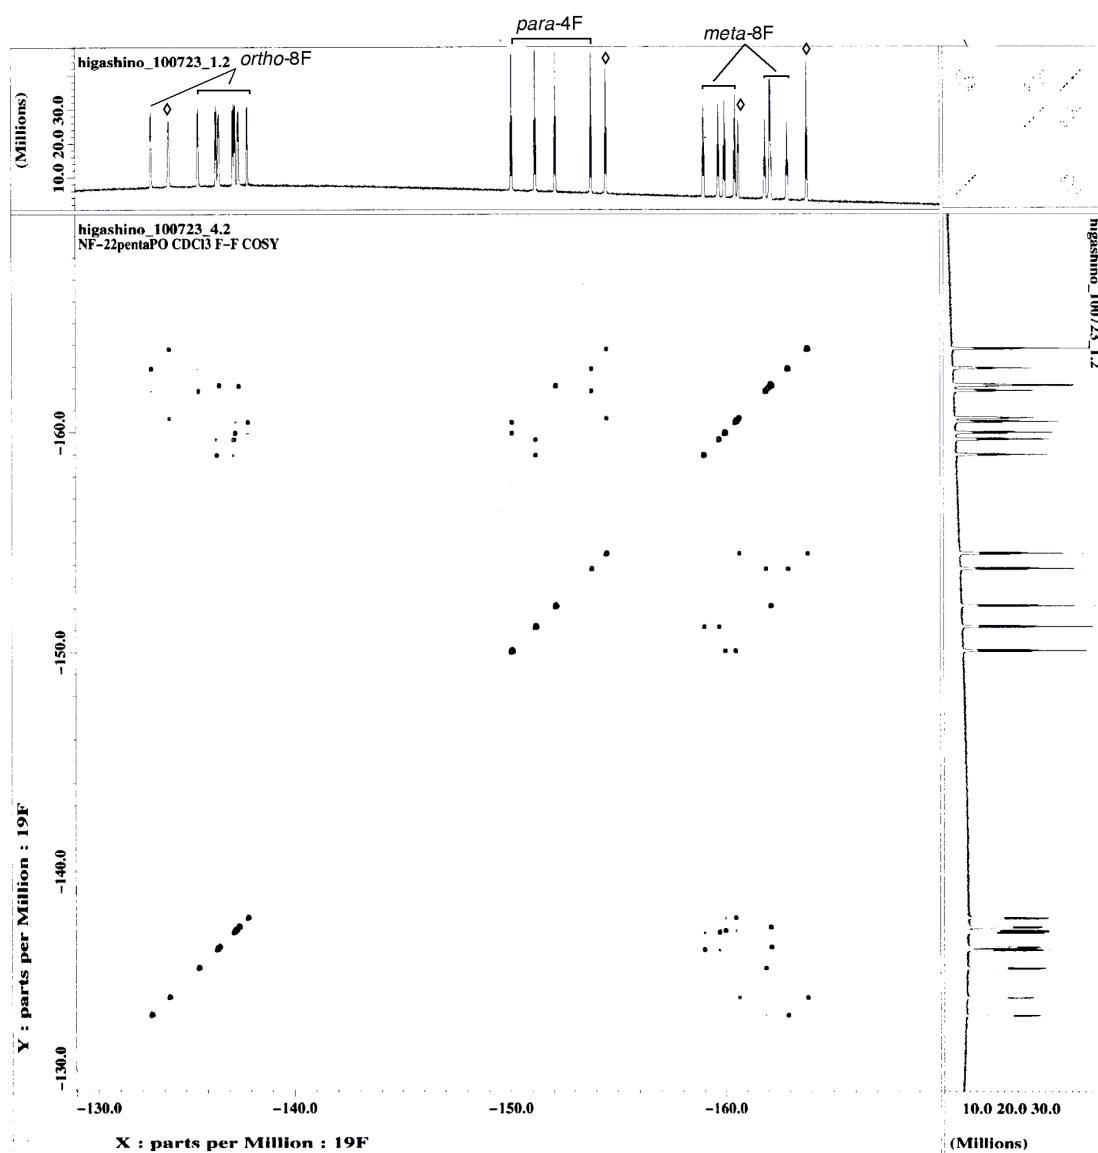

**Figure S10.**  $^{19}\text{F}$ - $^{19}\text{F}$  COSY NMR spectrum of **2** in  $\text{CDCl}_3$  at  $25\text{ }^\circ\text{C}$ . Peaks marked with  $\diamond$  are signals of fluorine atoms at the *N*-fused aryl substituent.

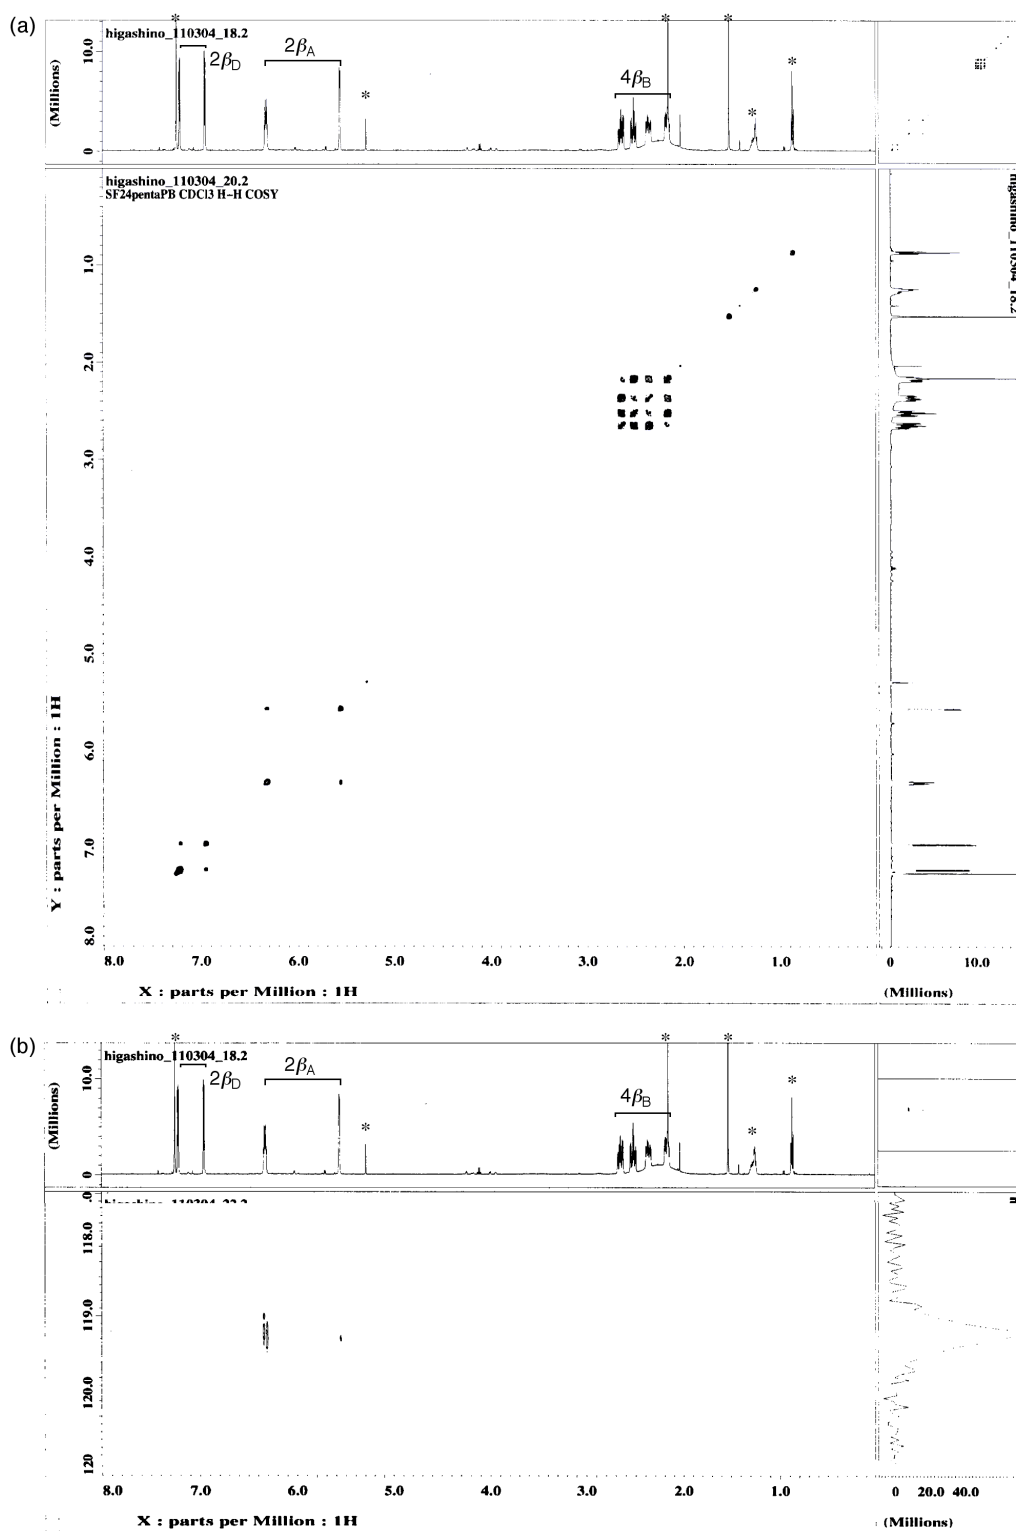

Figure S11. (a)  $^1\text{H}$ - $^1\text{H}$  COSY and (b)  $^1\text{H}$ - $^{31}\text{P}$  HMBC NMR spectra of **4** in  $\text{CDCl}_3$  at 25 °C. Peaks marked with \* are due to residual solvents and impurities.



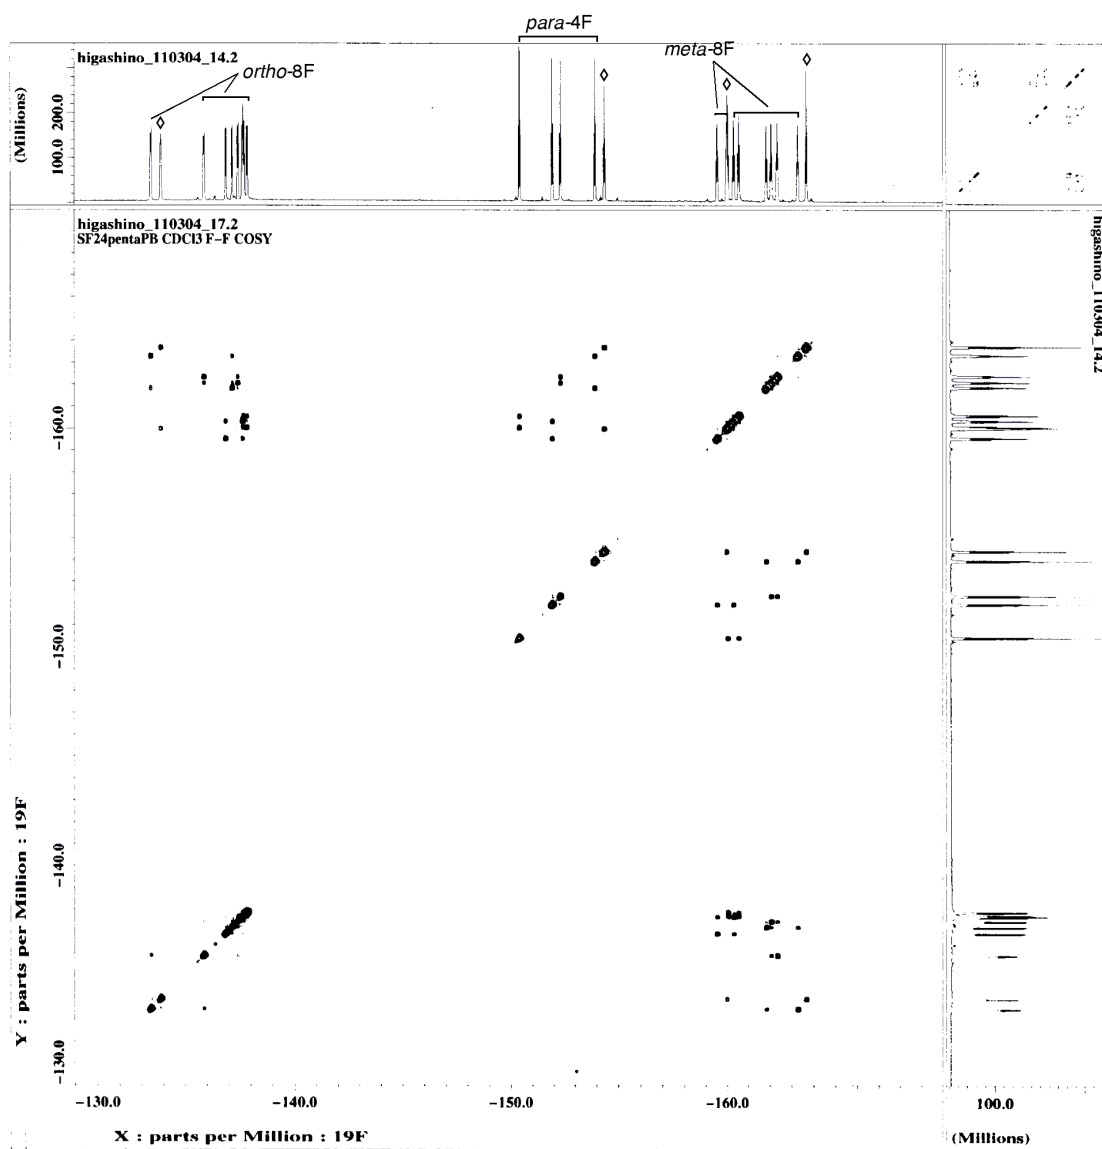

Figure S12. <sup>19</sup>F–<sup>19</sup>F COSY NMR spectrum of 4 in CDCl<sub>3</sub> at 25 °C. Peaks marked with ◊ are signals of fluorine atoms at the *N*-fused aryl substituent.

## 6. Cyclic Voltammograms

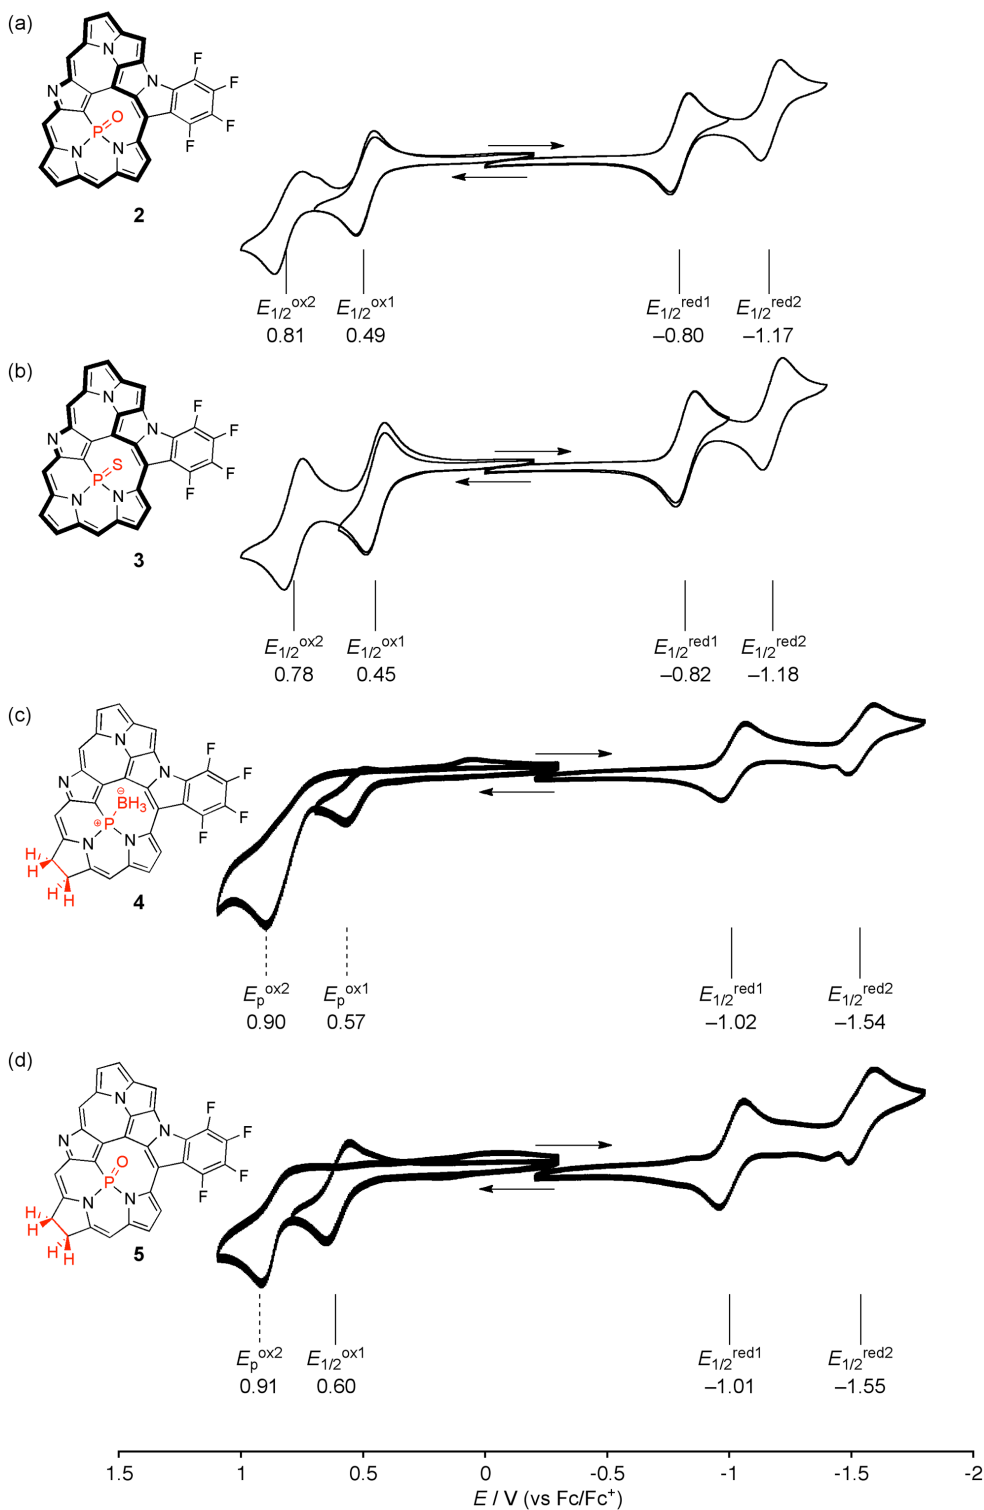

**Figure S13.** Cyclic voltammograms of (a) 2, (b) 3, (c) 4, and (d) 5. Cyclic voltammograms are measured in the following conditions; solvent: CH<sub>2</sub>Cl<sub>2</sub>; scan rate: (a, b) 0.05 V s<sup>-1</sup>, (c, d) 0.1 V s<sup>-1</sup>; working electrode: glassy carbon; reference electrode: Ag/AgClO<sub>4</sub>; electrolyte: Bu<sub>4</sub>NPF<sub>6</sub>.

## 7. X-Ray Crystallographic Details

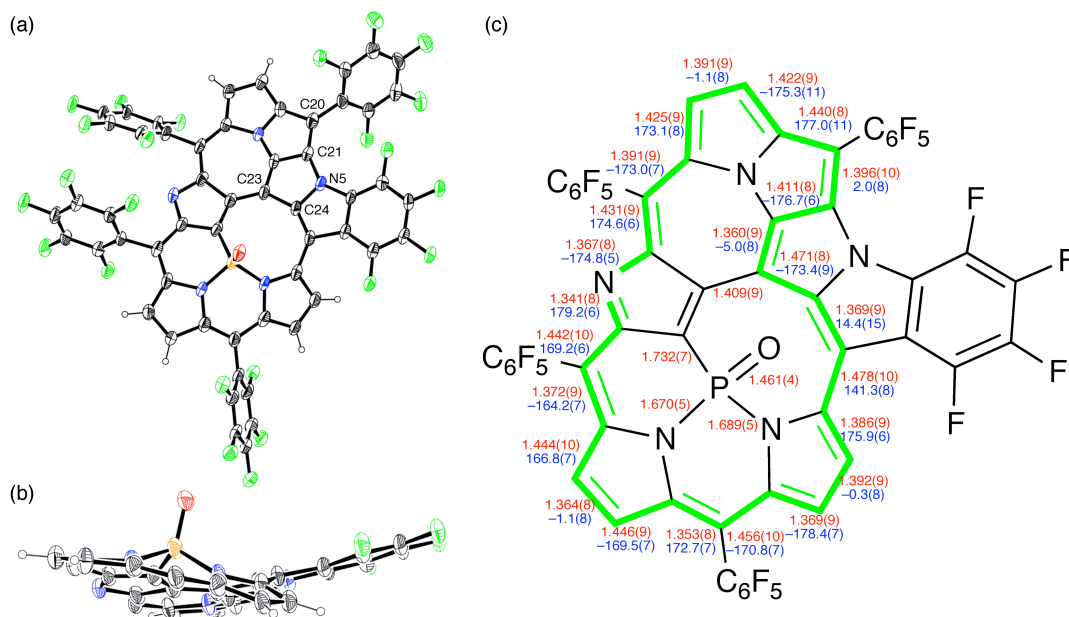

**Figure S14.** X-Ray crystal structure of **2**: (a) top view and (b) side view. Thermal ellipsoids represents 30% probability and solvent molecules are omitted for clarity. In the side view, *meso*-pentafluorophenyl substituents are omitted for clarity. (c) Detailed structural data of **2**. The conjugated 24 $\pi$ -electron circuit (green), along which bond lengths in Å (numbers in red), and dihedral angles in deg (numbers in blue) are indicated. (These values are one of the two molecules in the unit cell.)

PLAT723\_Alert\_1\_A of **2**: The bond length of C(20)–C(21), C(21)–N(5), N(5)–C(24), C(74)–C(75), C(75)–C(76), and C(76)–N(10) are 1.396(10), 1.412(8), 1.414(8), 1.443(9), 1.407(11), and 1.420(9) Å, respectively. In addition, C(23)–C(24) and C(78)–C(79) distances are 1.471(8) and 1.452(9) Å, which are likely C–C single bond. Probably, the CIF check program regarded the C(20)–C(21)–N(5)–C(24) and C(74)–C(75)–C(76)–N(10) as the  $sp^3$ -hybridized moiety, so that the Alert A may be reported.

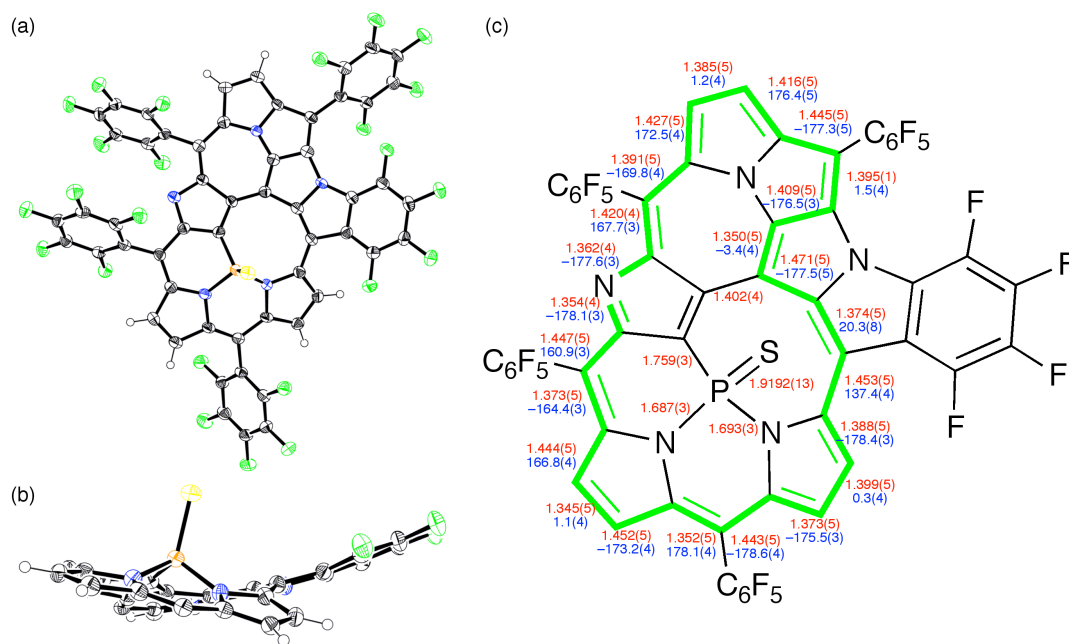

**Figure S15.** X-Ray crystal structure of 3: (a) top view and (b) side view. Thermal ellipsoids represents 50% probability and solvent molecules are omitted for clarity. In the side view, *meso*-pentafluorophenyl substituents are omitted for clarity. (c) Detailed structural data of 3. The conjugated 24 $\pi$ -electron circuit (green), along which bond lengths in Å (numbers in red), and dihedral angles in deg (numbers in blue) are indicated.

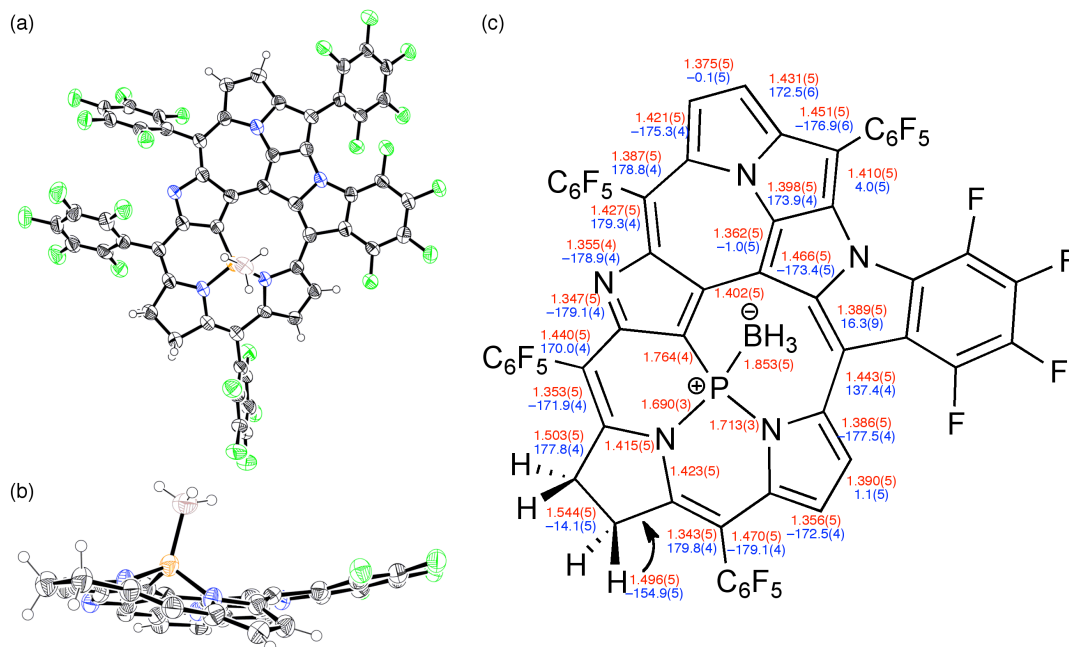

**Figure S16.** X-Ray crystal structure of 4: (a) top view and (b) side view. Thermal ellipsoids represents 50% probability and solvent molecules are omitted for clarity. In the side view, *meso*-pentafluorophenyl substituents are omitted for clarity. (c) Detailed structural data of 4. The bond lengths in Å (numbers in red), and dihedral angles in deg (numbers in blue) are indicated.

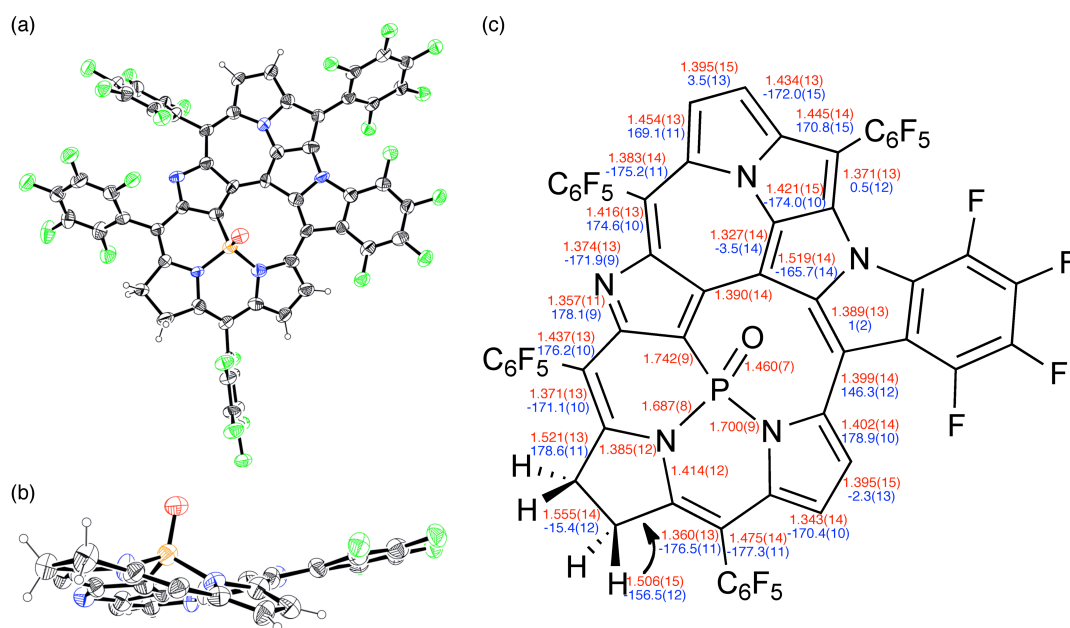

**Table S1.** Crystal data of **2**, **3**, **4** and **5**.

|                                                    | <b>2</b>                                                                                                     | <b>3</b>                                                                                               | <b>4</b>                                                                                                                                  | <b>5</b>                                                                                                                                    |
|----------------------------------------------------|--------------------------------------------------------------------------------------------------------------|--------------------------------------------------------------------------------------------------------|-------------------------------------------------------------------------------------------------------------------------------------------|---------------------------------------------------------------------------------------------------------------------------------------------|
| formula                                            | 4(C <sub>55</sub> H <sub>6</sub> F <sub>24</sub> N <sub>5</sub> OP)·<br>13(C <sub>6</sub> H <sub>5</sub> Cl) | C <sub>55</sub> H <sub>6</sub> F <sub>24</sub> N <sub>5</sub> PS·<br>3(C <sub>7</sub> H <sub>8</sub> ) | 2(C <sub>55</sub> H <sub>11</sub> BF <sub>24</sub> N <sub>5</sub> P)·<br>3(C <sub>6</sub> H <sub>14</sub> )·C <sub>7</sub> H <sub>8</sub> | C <sub>55</sub> H <sub>8</sub> F <sub>24</sub> N <sub>5</sub> OP·<br>C <sub>2</sub> H <sub>3</sub> N·0.75(CCl <sub>4</sub> )·<br>0.5(water) |
| <i>M<sub>r</sub></i>                               | 6421.63                                                                                                      | 1532.09                                                                                                | 2829.59                                                                                                                                   | 1405.92                                                                                                                                     |
| <i>T</i> [K]                                       | 93(2)                                                                                                        | 93(2)                                                                                                  | 93(2)                                                                                                                                     | 93(2)                                                                                                                                       |
| crystal system                                     | monoclinic                                                                                                   | monoclinic                                                                                             | monoclinic                                                                                                                                | triclinic                                                                                                                                   |
| space group                                        | <i>P</i> 2 <sub>1</sub> / <i>a</i> (No.14)                                                                   | <i>P</i> 2 <sub>1</sub> / <i>c</i> (No.14)                                                             | <i>C</i> 2/ <i>c</i> (No.15)                                                                                                              | <i>P</i> -1 (No.2)                                                                                                                          |
| <i>a</i> [Å]                                       | 29.5322(5)                                                                                                   | 19.4591(5)                                                                                             | 30.1073(6)                                                                                                                                | 10.1849(5)                                                                                                                                  |
| <i>b</i> [Å]                                       | 10.3705(2)                                                                                                   | 8.6913(2)                                                                                              | 18.0820(3)                                                                                                                                | 14.9773(8)                                                                                                                                  |
| <i>c</i> [Å]                                       | 41.5808(8)                                                                                                   | 37.1609(11)                                                                                            | 22.4608(4)                                                                                                                                | 17.6759(10)                                                                                                                                 |
| <i>α</i> [°]                                       | 90                                                                                                           | 90                                                                                                     | 90                                                                                                                                        | 85.568(3)                                                                                                                                   |
| <i>β</i> [°]                                       | 99.1602(8)                                                                                                   | 94.5998(18)                                                                                            | 106.2569(10)                                                                                                                              | 88.271(3)                                                                                                                                   |
| <i>γ</i> [°]                                       | 90                                                                                                           | 90                                                                                                     | 90                                                                                                                                        | 76.766(3)                                                                                                                                   |
| <i>V</i> [Å <sup>3</sup> ]                         | 12572.3(4)                                                                                                   | 6264.6(3)                                                                                              | 11738.8(4)                                                                                                                                | 2616.7(2)                                                                                                                                   |
| <i>Z</i>                                           | 2                                                                                                            | 4                                                                                                      | 4                                                                                                                                         | 2                                                                                                                                           |
| <i>ρ</i> <sub>calcd</sub> [g cm <sup>-3</sup> ]    | 1.696                                                                                                        | 1.624                                                                                                  | 1.601                                                                                                                                     | 1.784                                                                                                                                       |
| <i>R</i> <sub>1</sub> [ <i>I</i> > 2σ( <i>I</i> )] | 0.0993                                                                                                       | 0.0675                                                                                                 | 0.0759                                                                                                                                    | 0.1190                                                                                                                                      |
| <i>wR</i> <sub>2</sub> [all data]                  | 0.2961                                                                                                       | 0.1500                                                                                                 | 0.1619                                                                                                                                    | 0.3747                                                                                                                                      |
| GOF                                                | 0.988                                                                                                        | 1.057                                                                                                  | 1.001                                                                                                                                     | 1.076                                                                                                                                       |
| CCDC number                                        | 827555                                                                                                       | 827556                                                                                                 | 827554                                                                                                                                    | 842955                                                                                                                                      |

## 8. DFT Calculations

All calculations were carried out using the *Gaussian 09* program.<sup>S1</sup> Initial geometries were obtained from X-ray structures. All structures were fully optimized without any symmetry restriction. The calculations were performed by the density functional theory (DFT) method with restricted B3LYP (Becke's three-parameter hybrid exchange functionals and the Lee-Yang-Parr correlation functional) level,<sup>S2,S3</sup> employing a basis set 6-31G(d) for C, H, N, F, P, O, S and B. The NICS values and absolute <sup>1</sup>H shielding values were obtained with the GIAO method at the B3LYP/6-31G(d) level. The <sup>1</sup>H chemical shift values were calculated relative to CHCl<sub>3</sub> ( $\delta = 7.26$  ppm, absolute shielding: 24.94 ppm). The global ring centers for the NICS values were designated at the nonweighted means of the carbon and nitrogen coordinates on the peripheral positions of macrocycles. In addition, NICS values were also calculated on centres of other local cyclic structures as depicted in the following figures. Excitation energies and oscillator strengths for the crystal and optimized structures were calculated with the TD-SCF method at the B3LYP/6-31G(d) level.

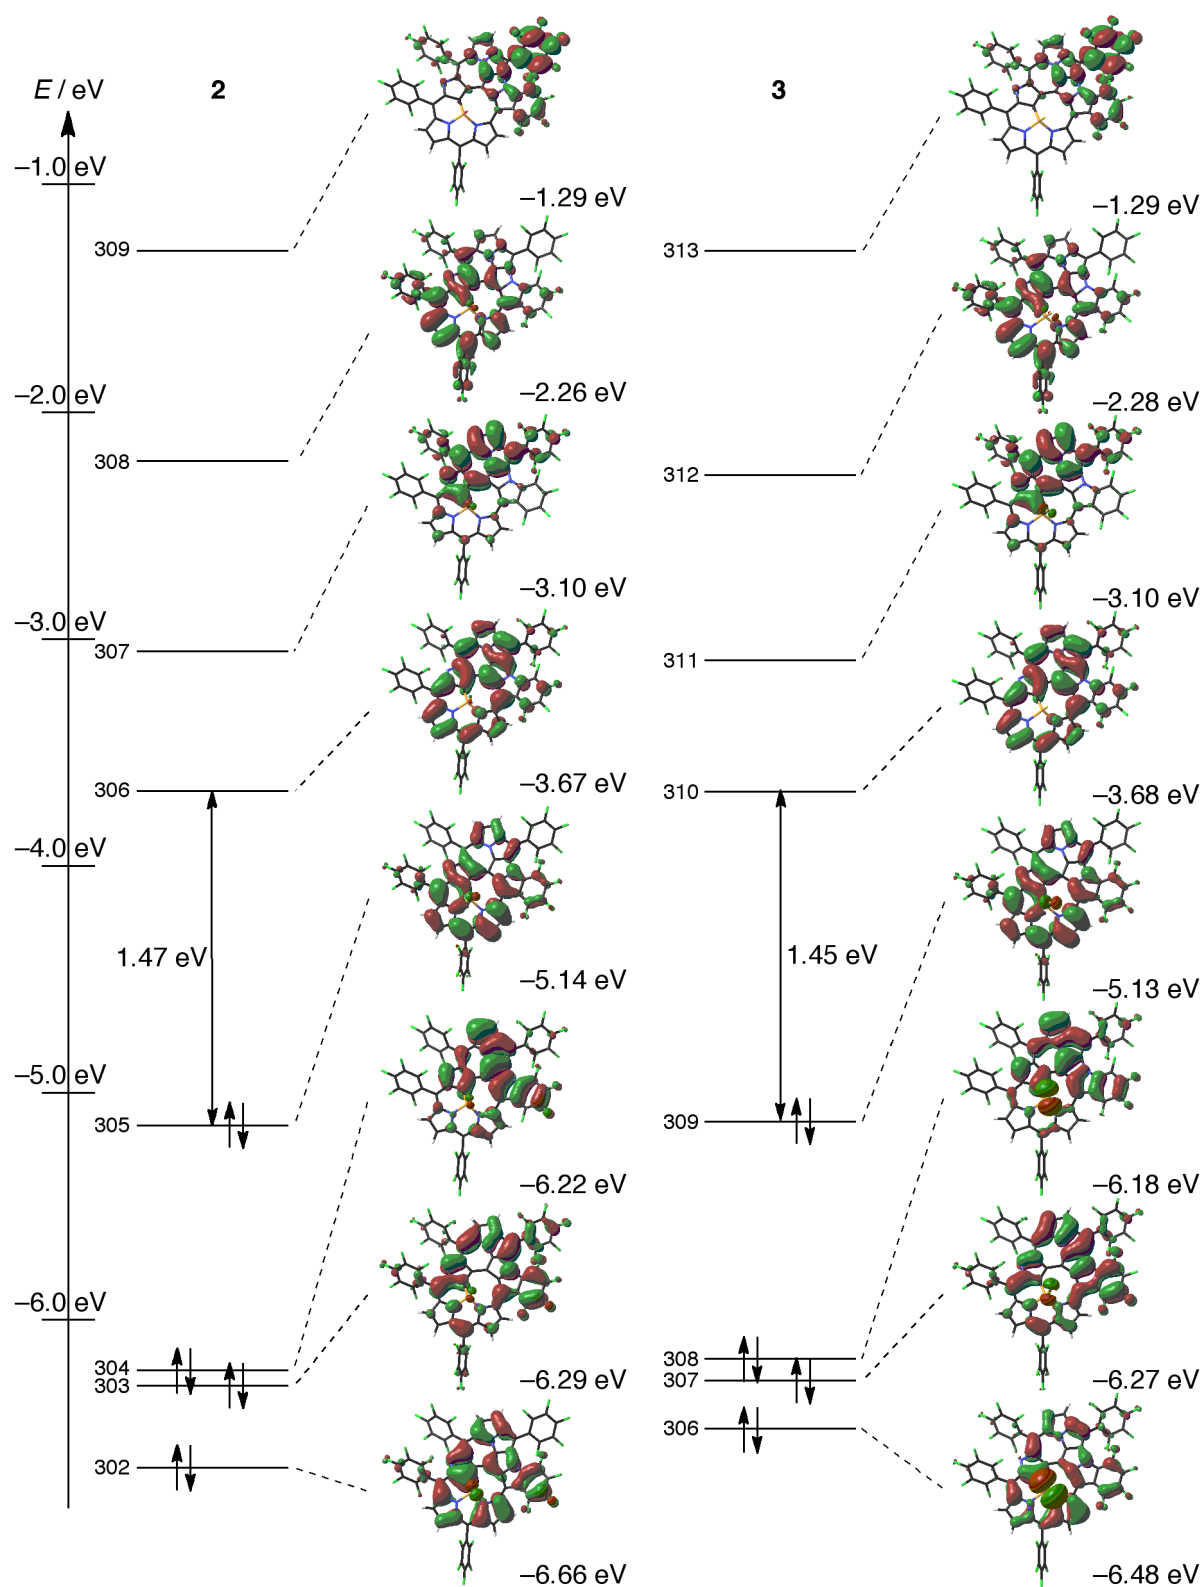

Figure S18. Selected molecular orbitals of 2 and 3 on the optimized structures.



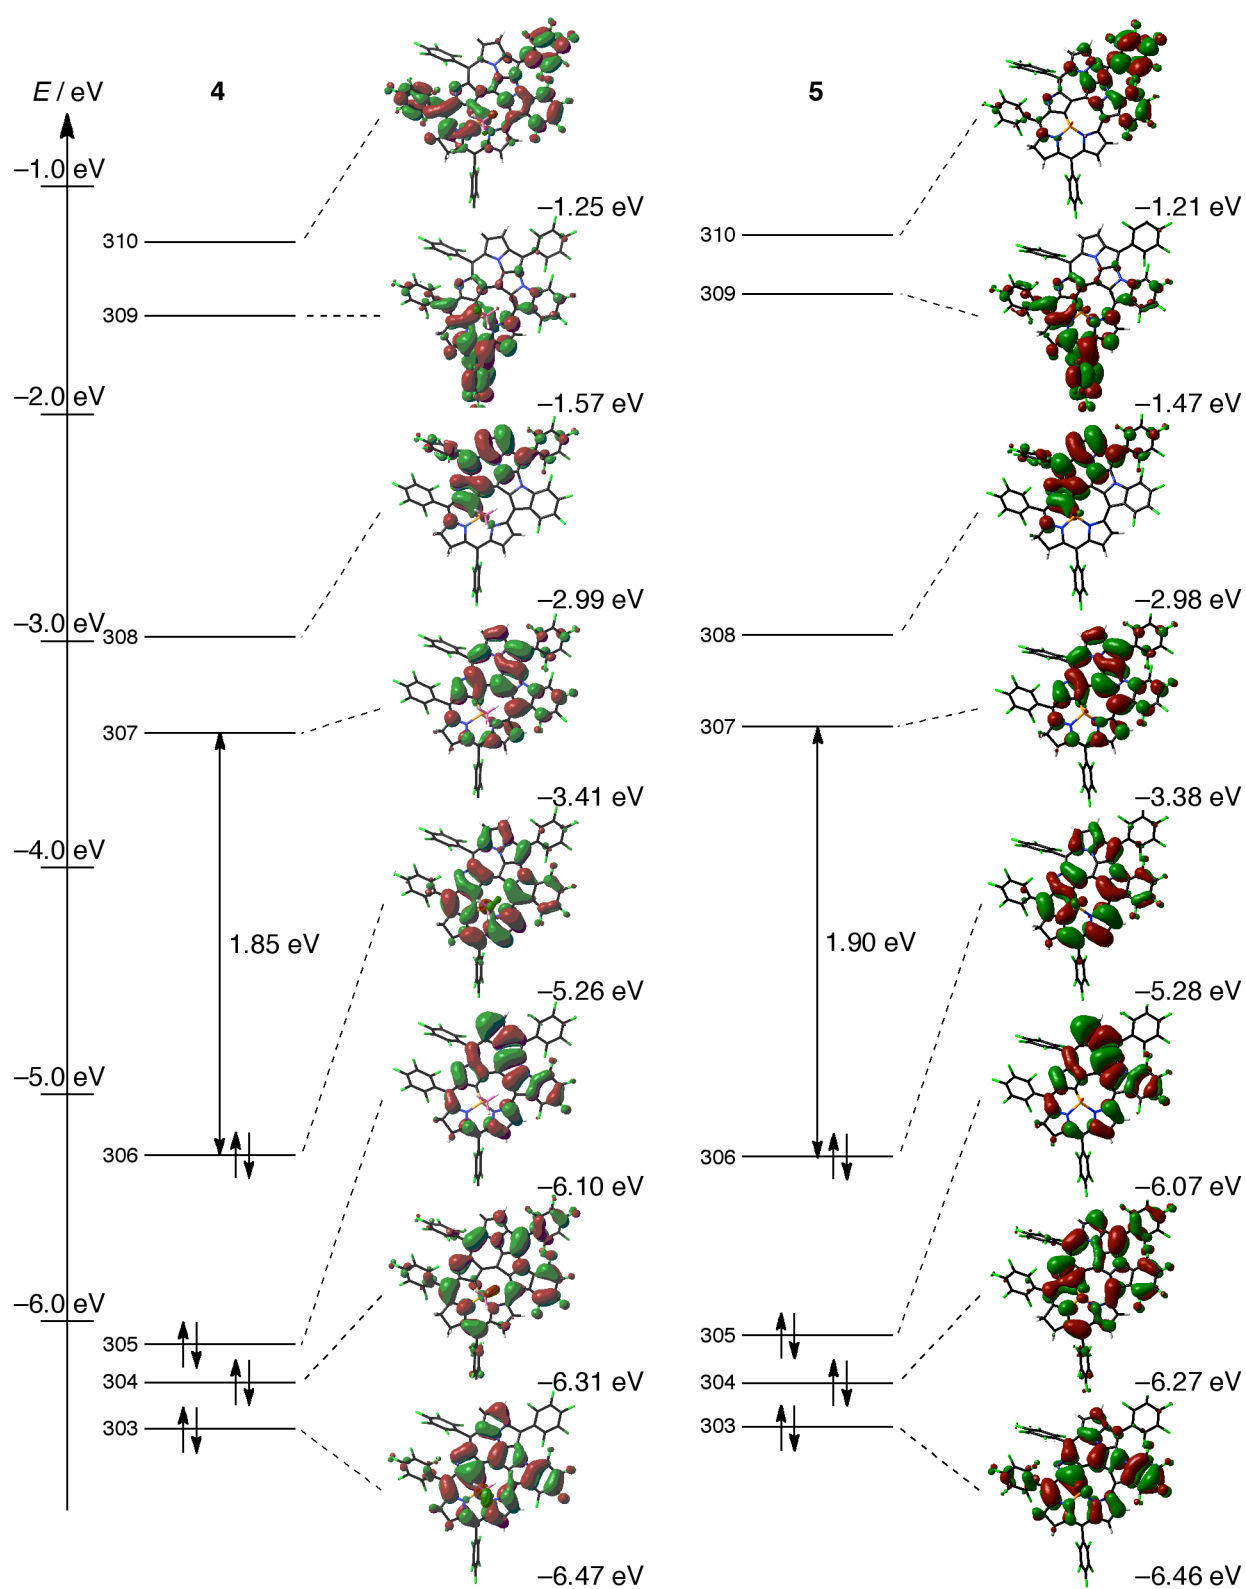

Figure S19. Selected molecular orbitals of 4 and 5 on the optimized structures.

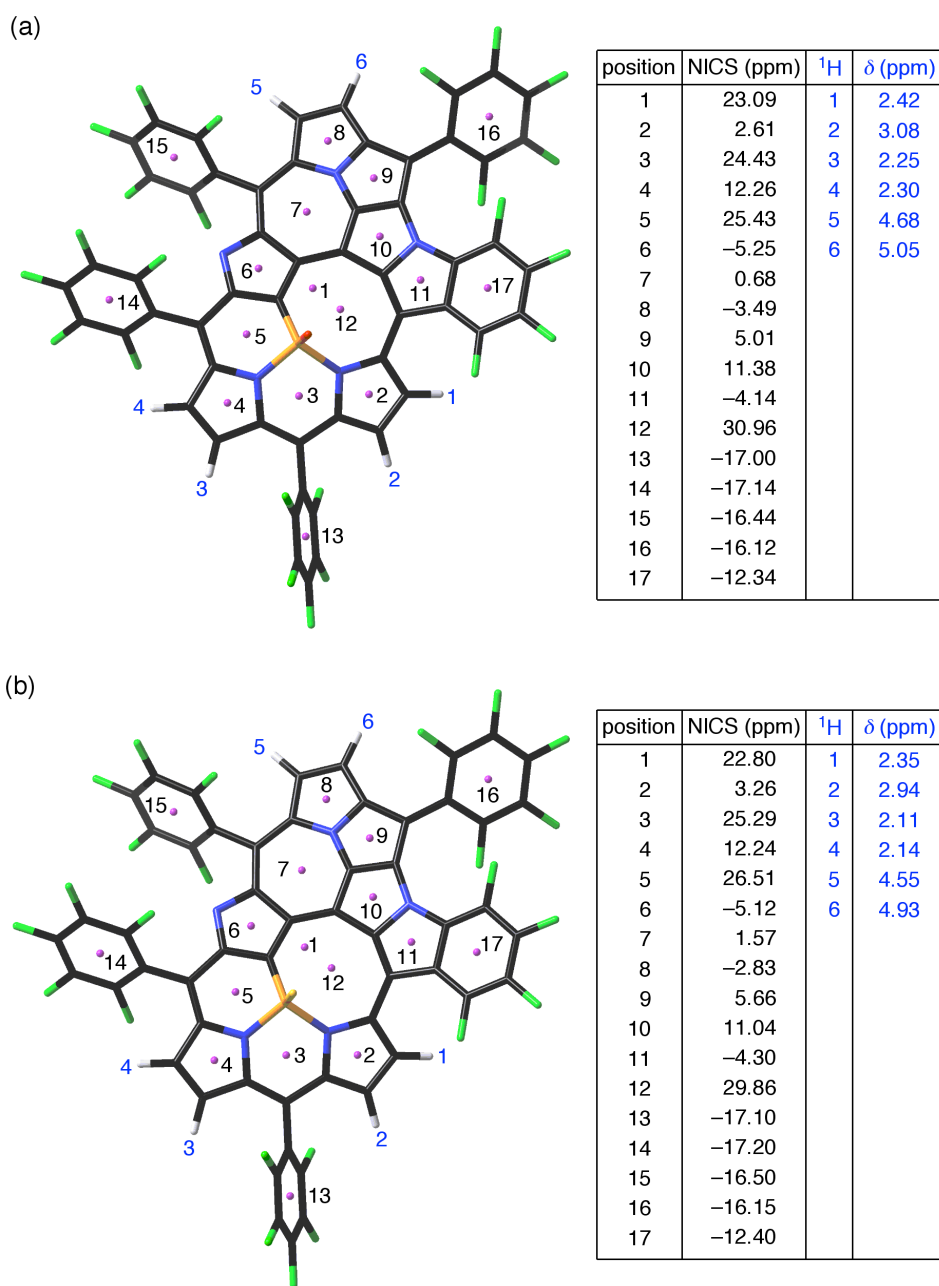

**Figure S20.** NICS values at various positions and simulated chemical shifts of (a) **2** and (b) **3** based on the optimized structures.

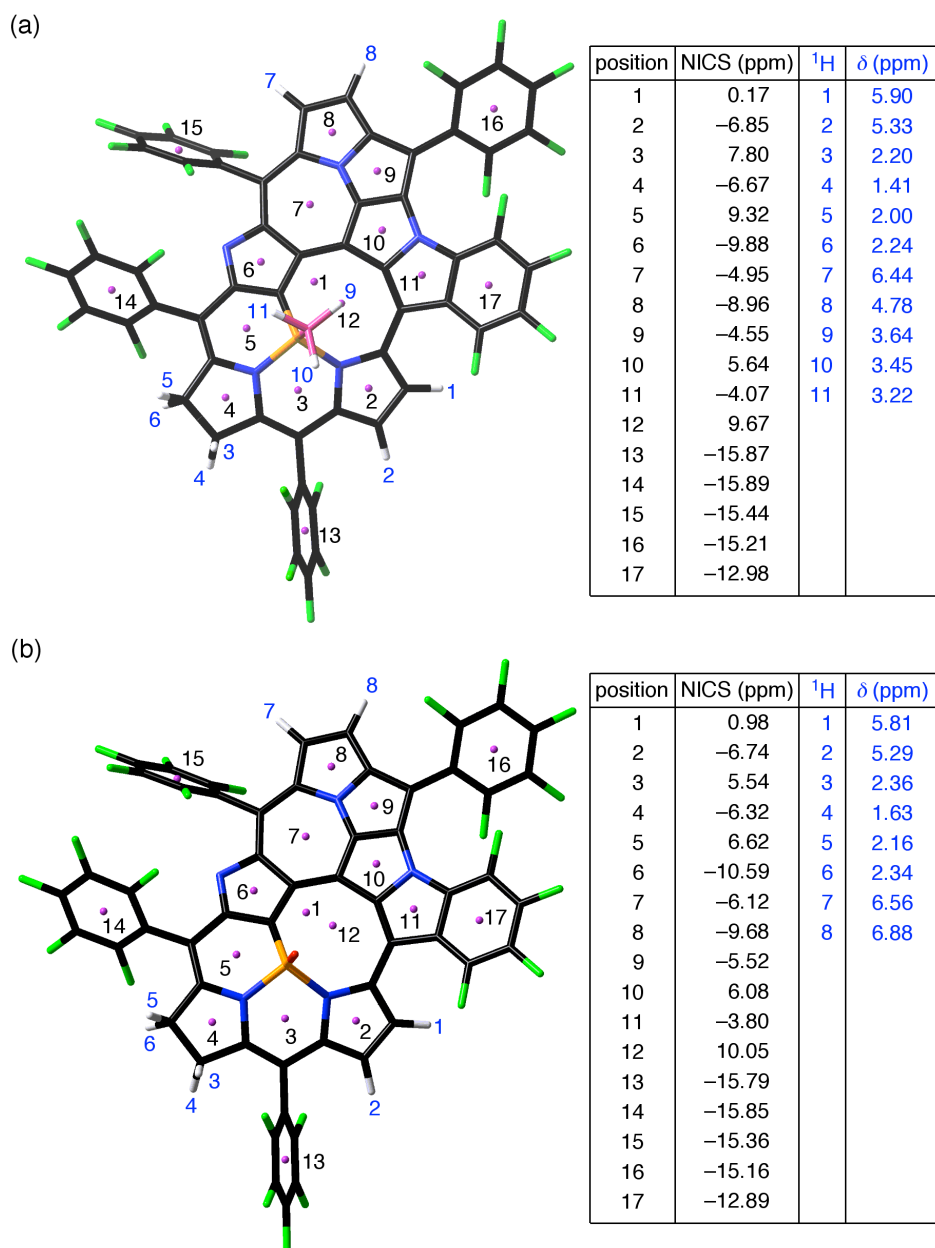

**Figure S21.** NICS values at various positions and simulated chemical shifts of (a) **4** and (b) **5** based on the optimized structures.

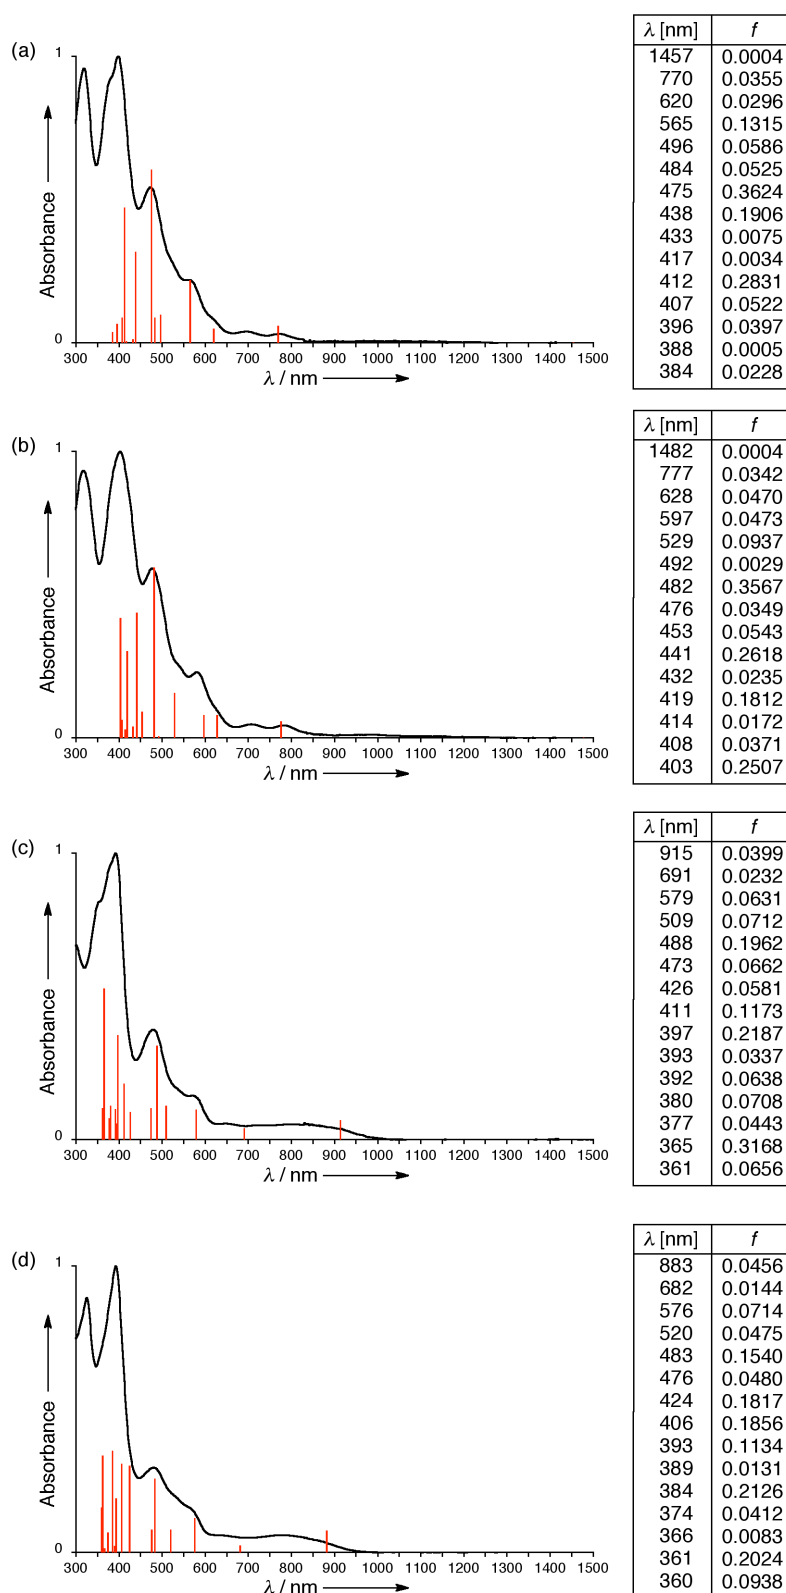

Figure S22. Calculated absorption spectra on the basis of optimized structures (bar) and observed absorption spectra (line) of (a) 2, (b) 3, (c) 4, and (d) 5.

## 9. References

[S1] S. Mori, J.-Y. Shin, S. Shimizu, F. Ishikawa, H. Furuta, A. Osuka, *Chem. Eur. J.*, 2005, **11**, 2417–2425.

[S2] Gaussian 09, Revision A.02, M. J. Frisch, G. W. Trucks, H. B. Schlegel, G. E. Scuseria, M. A. Robb, J. R. Cheeseman, G. Scalmani, V. Barone, B. Mennucci, G. A. Petersson, H. Nakatsuji, M. Caricato, X. Li, H. P. Hratchian, A. F. Izmaylov, J. Bloino, G. Zheng, J. L. Sonnenberg, M. Hada, M. Ehara, K. Toyota, R. Fukuda, J. Hasegawa, M. Ishida, T. Nakajima, Y. Honda, O. Kitao, H. Nakai, T. Vreven, J. A. Montgomery, Jr., J. E. Peralta, F. Ogliaro, M. Bearpark, J. J. Heyd, E. Brothers, K. N. Kudin, V. N. Staroverov, R. Kobayashi, J. Normand, K. Raghavachari, A. Rendell, J. C. Burant, S. S. Iyengar, J. Tomasi, M. Cossi, N. Rega, J. M. Millam, M. Klene, J. E. Knox, J. B. Cross, V. Bakken, C. Adamo, J. Jaramillo, R. Gomperts, R. E. Stratmann, O. Yazyev, A. J. Austin, R. Cammi, C. Pomelli, J. W. Ochterski, R. L. Martin, K. Morokuma, V. G. Zakrzewski, G. A. Voth, P. Salvador, J. J. Dannenberg, S. Dapprich, A. D. Daniels, O. Farkas, J. B. Foresman, J. V. Ortiz, J. Cioslowski, and D. J. Fox, Gaussian, Inc., Wallingford CT, 2009.

[S3] A. D. Becke, *J. Chem. Phys.*, 1993, **98**, 1372–1377.

[S4] C. Lee, W. Yang, R. G. Parr, *Phys. Rev. B*, 1998, **37**, 785–789.
